1  
2  
3  
4  
5  
6  
7  
8  
9  
10  
11  
12  
13  
14  
15  
16  
17  
18

**Mitochondrial dynamics regulate genome stability via control of caspase-dependent DNA damage**

Kai Cao <sup>1,2†</sup>, Joel S Riley <sup>1,2†</sup>, Catherine Cloix <sup>1,2</sup>, Yassmin Elmasry <sup>1,2</sup>, Gabriel Ichim <sup>3</sup>, Kirsteen J Campbell <sup>1,2</sup>, Stephen WG Tait <sup>1,2\*</sup>

<sup>1</sup> Cancer Research UK Beatson Institute, Bearsden, Glasgow, G61 1BD, UK.

<sup>2</sup> Institute of Cancer Sciences, College of Medical, Veterinary and Life Sciences, University of Glasgow, Bearsden, Glasgow, G61 1QH, UK.

<sup>3</sup> Cancer Research Centre of Lyon (CRCL) INSERM 1052, CNRS 5286, Lyon, France.

† Equal contribution

\* Corresponding author: [stephen.tait@glasgow.ac.uk](mailto:stephen.tait@glasgow.ac.uk)

19 **Summary**

20 Mitochondrial dysfunction is interconnected with cancer. Nevertheless, how defective  
21 mitochondria promote cancer is poorly understood. We find that mitochondrial dysfunction  
22 promotes DNA damage under conditions of increased apoptotic priming. Underlying this  
23 process, we reveal a key role for mitochondrial dynamics in the regulation of DNA damage  
24 and genome instability. The ability of mitochondrial dynamics to regulate oncogenic DNA  
25 damage centres upon the control of minority MOMP, a process that enables non-lethal  
26 caspase activation leading to DNA damage. Mitochondrial fusion suppresses minority MOMP,  
27 and its associated DNA damage, by enabling homogenous mitochondrial expression of anti-  
28 apoptotic BCL-2 proteins. Finally, we find that mitochondrial dysfunction inhibits pro-apoptotic  
29 BAX retrotranslocation, causing BAX mitochondrial localization thereby promoting minority  
30 MOMP. Unexpectedly, these data reveal oncogenic effects of mitochondrial dysfunction that  
31 are mediated via mitochondrial dynamics and caspase-dependent DNA damage.

32

## 33 **Introduction**

34 Mitochondrial dysfunction has pleiotropic impact on cancer (Giampazolias and Tait,  
35 2016). For instance, mitochondrial respiratory complex proteins and TCA enzymes bearing  
36 tumour associated mutations, generate oncometabolites (Isaacs et al., 2005; Pollard et al.,  
37 2007; Sciacovelli et al., 2016; Selak et al., 2005). Moreover, loss of function mutations in  
38 mitochondrial DNA (mtDNA) are common in cancer and have been shown to accelerate  
39 tumorigenesis (Gorelick et al., 2021; Smith et al., 2020). Nonetheless, how dysfunctional  
40 mitochondria promote cancer remains largely an open question.

41

42 While inhibition of mitochondrial apoptosis has well established oncogenic effects,  
43 through increased apoptotic priming, tumour cells are often sensitized to cell killing cancer  
44 therapies (Certo et al., 2006; Singh et al., 2019). Mitochondria regulate apoptosis via  
45 mitochondrial outer membrane permeabilization or MOMP (Bock and Tait, 2020). This key  
46 event releases soluble mitochondrial intermembrane space proteins into the cytoplasm,  
47 notably cytochrome *c*, that activate caspases proteases causing rapid cellular demise.  
48 Because it dictates cell fate, mitochondrial outer membrane integrity is tightly regulated by  
49 BCL-2 protein family members (Campbell and Tait, 2018).

50

51 MOMP is usually considered a lethal point-of-no-return due to its extensive nature,  
52 often occurring in all mitochondria, coupled to an invariable loss of mitochondrial function  
53 (Goldstein et al., 2000; Lartigue et al., 2009; Rehm et al., 2003). However, we have previously  
54 described conditions whereby MOMP can be heterogenous permitting cell survival (Ichim et  
55 al., 2015; Tait et al., 2010). Following a sub-lethal stress, a limited mitochondrial cohort  
56 selectively permeabilizes, which we termed minority MOMP (Ichim et al., 2015). Strikingly,  
57 minority MOMP can engage sub-lethal caspase activity promoting DNA damage that is  
58 dependent upon caspase-activated DNase (CAD) (Ichim et al., 2015). By causing DNA  
59 damage, minority MOMP may contribute to the paradoxical oncogenic effects of apoptotic  
60 signaling reported in different studies (Ichim and Tait, 2016). Moreover, minority MOMP has  
61 been recently implicated in an expanding array of functions including increased cancer  
62 aggressiveness, innate immunity and inflammation triggered by mtDNA double-strand breaks  
63 (Berthenet et al., 2020; Brokatzky et al., 2019; Tigano et al., 2021).

64

65 Here, we investigated the relationship between mitochondrial dysfunction and DNA  
66 damage. Surprisingly, we uncovered a key role for mitochondrial dynamics in the regulation  
67 of DNA damage. Mitochondrial fission, a consequence of mitochondrial dysfunction, promotes  
68 minority MOMP causing caspase-dependent DNA damage and genome instability. Secondly,  
69 we find reduced retrotranslocation of pro-apoptotic BAX on dysfunctional mitochondria, thus

70 facilitating minority MOMP. These data reveal an unanticipated link between mitochondrial  
71 dysfunction and oncogenic DNA damage that is mediated through minority MOMP and  
72 caspase activity.

73

74

## 75 **Results**

### 76 **Mitochondrial dynamics regulate DNA damage**

77 We aimed to understand how mitochondrial dysfunction can be oncogenic. Given the  
78 tumor promoting roles of DNA damage, we initially investigated its interconnection with  
79 mitochondrial function. To cause mitochondrial dysfunction, U2OS and HeLa cells were  
80 treated with the uncoupler carbonyl cyanide *m*-chlorophenyl hydrazone (CCCP). In order to  
81 phenocopy increased apoptotic priming that is found in pre-malignant and tumour cells, we  
82 co-treated cells with ABT-737, a BH3-mimetic compound that selectively neutralises anti-  
83 apoptotic BCL-2, BCL-xL and BCL-w . The response to DNA damage was measured by  
84  $\gamma$ H2AX staining and flow cytometry. In both HeLa and U2OS cells BH3-mimetic treatment led  
85 to an increase in  $\gamma$ H2AX positive cells that was significantly enhanced by combined treatment  
86 with CCCP, consistent with mitochondrial dysfunction promoting DNA damage (**Figure 1A**).  
87 Mitochondrial dynamics and function are tightly interconnected such that mitochondrial  
88 dysfunction causes mitochondrial fission (Oltersdorf et al., 2005). We therefore investigated  
89 whether mitochondrial dynamics affected DNA damage triggered by BH3-mimetic treatment.  
90 To disrupt mitochondrial fusion, we used *Mfn1/2*<sup>-/-</sup> murine embryonic fibroblasts (*Mfn1/2*<sup>-/-</sup>  
91 MEF) and, as control, reconstituted these cells with MFN2 (*Mfn1*<sup>-/-</sup> MEF). As expected, *Mfn1/2*<sup>-/-</sup>  
92 MEF displayed a hyper-fragmented mitochondrial network whereas MFN2 reconstitution of  
93 these cells (*Mfn1*<sup>-/-</sup>) restored mitochondrial fusion, resulting in a filamentous mitochondrial  
94 network (**Figure 1B, C**). *Mfn1/2*<sup>-/-</sup> and *Mfn1*<sup>-/-</sup> MEF were treated with ABT-737 (10  $\mu$ M, 3 hours)  
95 and the DNA damage response was assessed by analyzing  $\gamma$ H2AX levels by western blot or  
96 by flow cytometry (**Figures 1D, E**). *Mfn1/2*<sup>-/-</sup> MEF exhibited increased  $\gamma$ H2AX, consistent with  
97 mitochondrial fission promoting DNA damage. Because DNA damage can be oncogenic, we  
98 investigated if cells with extensive mitochondrial fission were more prone to transformation.  
99 *Mfn1/2*<sup>-/-</sup> and *Mfn1*<sup>-/-</sup> MEF were passaged repeatedly in ABT-737. Following treatment, cells  
100 were assayed for transformation *in vitro* by determining anchorage-independent growth in soft  
101 agar. Specifically following culture in ABT-737, *Mfn1/2*<sup>-/-</sup> MEF formed colonies more readily  
102 *Mfn1*<sup>-/-</sup> MEF (**Figure 1F, G**). In reciprocal fashion, we investigated the impact of inhibiting  
103 mitochondrial fission upon DNA damage. DRP1 plays a central role in mitochondrial fission  
104 (Ishihara et al., 2009; Wakabayashi et al., 2009). To inhibit mitochondrial fission we used  
105 *Drp1*<sup>fl/fl</sup> MEF, which when infected with adenoviral Cre efficiently delete DRP1, causing a



106 hyper-fused mitochondrial network (**Figure 1H, Supplementary Figure 1A**). *Drp1<sup>fl/fl</sup>* and *Drp1*<sup>-/-</sup> MEF were treated with ABT-737 and  $\gamma$ H2AX was measured by flow cytometry, as before.  
107  
108 MEF expressing DRP1 have elevated levels of  $\gamma$ H2AX after exposure to ABT-737, but this  
109 was completely abolished in DRP1-deficient cells (**Figure 1I**). These data show that  
110 mitochondrial dysfunction and fission promote oncogenic DNA damage and transformation.

### 111 112 **Mitochondrial dynamics regulate DNA damage and genome-instability in a caspase and** 113 **CAD dependent manner**

114 We next sought to understand how mitochondrial dynamics regulate DNA damage.  
115 Because we had found that pro-apoptotic BH3-mimetic treatment potentiated DNA damage,  
116 we investigated a role for apoptotic caspase function. Wild type MEF or MEF overexpressing  
117 DRP1 were treated with the pan-caspase inhibitor qVD-OPh and  $\gamma$ H2AX was measured by  
118 flow cytometry (**Figure 2A, B, Supplementary Figure 2A, B**). MEF cells overexpressing  
119 DRP1 displayed a more fragmented mitochondrial network and had higher levels of  $\gamma$ H2AX  
120 compared to their empty vector counterparts, this is consistent with our earlier data. Crucially,  
121  $\gamma$ H2AX was prevented by treatment with the pan-caspase inhibitor qVD-OPh, demonstrating  
122 a key role for caspase activation in DNA damage (**Figure 2B**). Given these findings, we  
123 investigated a possible correlation between expression of the mitochondrial fission protein  
124 DRP1 and mutational burden in cancer. TCGA PanCancer Atlas studies were investigated  
125 through cBioportal. Of these, a significant association between increased mutational count  
126 in *DNM1L* mRNA high quartile versus *DNM1L* mRNA low quartile was found in invasive  
127 breast carcinoma and lung adenocarcinoma (out of 22 studies) with the inverse relationship  
128 not observed in any cancer type (**Figures 2C, 2D, Supplemental Table 1** and data not  
129 shown). In both invasive breast cancer and lung adenocarcinoma, DNA damage response  
130 pathways were enriched in the *DNM1L* mRNA high quartile consistent with engagement of  
131 DNA damage (**Supplementary Figures 2C, D, E**). To further investigate the role of caspase  
132 activity, we investigated the impact of mitochondrial dynamics upon genome instability. To this  
133 end, we used the PALA assay, in which gene amplification of CAD (carbamyl phosphate  
134 synthetase/aspartate transcarbamylase/dihydro-ototase, note that this is distinct from  
135 caspase-activated DNase described later) enables resistance to PALA (N-phosphonoacetyl-  
136 L-aspartate)(Wahl et al., 1979). To determine if alterations in mitochondrial dynamics, also  
137 affect genome instability dependent upon caspase activity, we passaged *Mfn1/2<sup>-/-</sup>* and *Mfn1<sup>-/-</sup>*  
138 MEF with sub-lethal doses of ABT-737 in the presence or absence of QVD-OPh. Following  
139 treatment, cells were grown in the presence of PALA and clonogenic survival was measured  
140 (**Figure 2E**). Importantly, ABT-737 treated *Mfn1/2<sup>-/-</sup>* MEF gave significantly more colonies than  
141 *Mfn1<sup>-/-</sup>* following PALA treatment, in a caspase-dependent manner (**Figure 2E, F**). In line with

142 increased survival following PALA treatment, qPCR revealed amplification of the *Cad* locus  
143 only in *Mfn1/2*<sup>-/-</sup> MEF repeatedly treated with ABT-737 (**Figure 2G**). We and others have  
144 previously found that non-lethal caspase activity can cause DNA damage and genome  
145 instability dependent upon caspase-activated DNase (CAD) (Ichim et al., 2015; Lovric and  
146 Hawkins, 2010). To examine the role of CAD in genomic instability we used the *Mfn1/2*<sup>-/-</sup> and  
147 *Mfn1*<sup>-/-</sup> MEF in which we deleted the *Dff40* gene (encoding CAD) using CRISPR-Cas9 genome  
148 editing (**Supplementary Figure 2F**). As before, *Mfn1/2*<sup>-/-</sup> cells resisted PALA treatment and  
149 efficiently grew as colonies following ABT-737 treatment, whereas *Mfn1*<sup>-/-</sup> cells did not (**Figure**  
150 **2H, I**). However, deletion of CAD completely abrogated clonogenic potential. *Cad* DNA  
151 expression and anchorage-independent growth were also diminished following ABT-737  
152 treatment in *CAD/Dff40* deleted cells as compared to their controls (**Figure 2J, K,**  
153 **Supplementary Figure 2G**). Together, these data show that mitochondrial fission promotes  
154 genome instability in a caspase and CAD dependent manner.

155

### 156 **Minority MOMP occurs on fragmented mitochondria and is regulated by mitochondrial** 157 **dynamics**

158 We have previously found that permeabilization of limited mitochondria – called  
159 minority MOMP – can engage non-lethal caspase activity causing CAD activation and DNA  
160 damage. This knowledge, coupled to our previous data, led us to investigate a role for  
161 mitochondrial dynamics in the regulation of minority MOMP. To address this, we combined  
162 super-resolution Airyscan confocal microscopy together with our fluorescent reporter that  
163 allows detection of minority MOMP (Ichim et al., 2015). This reporter comprises cytosolic  
164 FKBP-GFP (cytoGFP) and mitochondrial inner membrane targeted FRB-mCherry (mito-  
165 mCherry). Upon loss of mitochondrial outer membrane integrity, and in the presence of  
166 chemical heterodimeriser (AP21967), these two proteins bind one another, recruiting cytoGFP  
167 to the permeabilised mitochondria. HeLa or U2OS were treated with a non-lethal dose of BH3-  
168 mimetic ABT-737 (10  $\mu$ M) for 3 hours. Consistent with our previous data, this treatment was  
169 sufficient to engage minority MOMP, as evidenced by localisation of cytoGFP to specific  
170 mitochondria (**Figure 3A**). Super-resolution analysis of these mitochondria revealed that  
171 selectively permeabilised mitochondria were separate from the mitochondria network,  
172 suggesting that minority MOMP preferentially occurs on fragmented mitochondria (**Figure 3A,**  
173 **B**). Extensive mitochondrial fission is a well-established consequence of MOMP (Bhola et al.,  
174 2009; Frank et al., 2001). Therefore, to determine whether mitochondria fragmentation was a  
175 cause or consequence of minority MOMP, U2OS cells expressing cytoGFP and mito-mCherry  
176 were imaged by live-cell microscopy. Treatment with ABT-737 (10  $\mu$ M) led to minority MOMP,  
177 apparent by the translocation of cytoGFP into mitochondria after 124 minutes. Importantly,  
178 these mitochondria were fragmented from the mitochondrial network prior to cytoGFP

179 translocation at 120 minutes (**Figure 3C, Movie 1**). This suggests that minority MOMP  
180 preferentially occurs on fragmented mitochondria. We next investigated a causal role for  
181 mitochondrial dynamics in regulating minority MOMP. We next used these cells to investigate  
182 a role for mitochondrial fusion in regulating minority MOMP. *Mfn1/2<sup>-/-</sup>* and *Mfn1<sup>-/-</sup>* MEF  
183 expressing the MOMP reporter, were treated with a sub-lethal dose of ABT-737. Strikingly,  
184 increased levels of minority MOMP were observed in *Mfn1/2<sup>-/-</sup>* MEF when compared to *Mfn1<sup>-/-</sup>*  
185 *-/-* MEF (**Figure 3D**). This is consistent with minority MOMP occurring primarily on fragmented  
186 mitochondria, with mitochondrial fusion having an inhibitory effect. To further address this, we  
187 investigated the impact of inhibiting mitochondrial fission upon minority MOMP following  
188 treatment of *Drp1<sup>fl/fl</sup>* and *Drp1<sup>-/-</sup>* MEF with ABT-737. MEF expressing DRP1 undergo minority  
189 MOMP and after exposure to ABT-737, but this was completely abolished in DRP1-deleted  
190 cells (**Figure 3E**). Together, these data demonstrate that mitochondrial dynamics regulate  
191 minority MOMP; mitochondrial fusion is inhibitory whereas fission promotes minority MOMP.

192

### 193 **Pro-survival BCL-2 proteins display inter-mitochondrial heterogeneity in expression**

194 Our data demonstrate that mitochondrial fission promotes minority MOMP enabling  
195 caspase dependent DNA damage. Nevertheless, how mitochondrial dynamics regulate  
196 minority MOMP is not known. Mitochondrial outer membrane integrity is regulated by the  
197 balance of pro- and anti-apoptotic BCL-2 family proteins (Campbell and Tait, 2018). We  
198 hypothesised that inter-mitochondrial variation in BCL-2 family expression may underlie  
199 minority MOMP. To investigate this hypothesis, we aimed to visualise endogenous levels of  
200 BCL-2 family proteins on individual mitochondria. CRISPR-Cas9 genome editing can be used  
201 to knock-in fluorescent proteins at defined genomic loci to enable endogenous tagging of  
202 proteins (Bukhari and Muller, 2019). Using this approach, we generated clonal knock-in HeLa  
203 cell lines where the red fluorescent protein Scarlet was fused to the N-termini of BCL-2, BCL-  
204 xL and MCL-1. As verification, western blotting using antibodies specific BCL-2, BCL-xL, MCL-  
205 1 and Scarlet confirmed that these cell lines expressed these fusion proteins at similar levels  
206 to their endogenous counterparts (**Figure 4A, B**). Secondly, Airyscan super-resolution  
207 microscopy demonstrated mitochondrial localisation of Scarlet-BCL-2, BCL-xL and MCL-1, as  
208 expected (**Figure 4C**). Finally, we monitored cell viability using SYTOX Green exclusion and  
209 IncuCyte real-time imaging in response to BH3-mimetic treatment (ABT-737 and S63845).  
210 This demonstrated that all knock-in cell lines underwent cell death in response to BH3-mimetic  
211 treatment (**Supplementary Figure 3A**). Using these knock-in cells, we next acquired super-  
212 resolution microscopy images of Scarlet-tagged BCL-2, BCL-xL and MCL-1 then applied a  
213 colour grading lookup table (LUT) such that the brighter the Scarlet signal, the more magenta  
214 the image. This revealed heterogeneity of Scarlet BCL-2, BCL-xL and MCL-1 across the  
215 mitochondrial network (**Figure 4D**). Given our previous data, we hypothesised that BCL-2

216 family protein heterogeneity is regulated by mitochondrial dynamics. To test this, we inhibited  
217 mitochondrial fission through CRISPR-Cas9 deletion of DRP1. Western blot confirmed DRP1  
218 deletion, resulting in extensive mitochondrial hyperfusion (**Supplementary Figure 3B, C**).  
219 Strikingly, cells with hyperfused mitochondria displayed much reduced inter-mitochondrial  
220 heterogeneity of MCL-1, BCL-2 or BCL-xL (**Figure 4E, F, Supplementary Figure 3D**).  
221 Combined, these data show that within a cell extensive inter-mitochondrial heterogeneity in  
222 BCL-2 expression exists that is profoundly impacted by mitochondrial dynamics.

223

#### 224 **Heterogeneity in apoptotic priming underpins minority MOMP**

225 We next investigated whether there was a relationship between expression of anti-  
226 apoptotic BCL-2 proteins and minority MOMP. To investigate this, we acquired super-  
227 resolution time-lapse movies of HeLa cells expressing endogenous Scarlet-BCL-2, BCL-xL or  
228 MCL-1, together with Omi-GFP and MitoTracker Deep Red. During MOMP, soluble  
229 intermembrane space proteins, including Omi, are released from mitochondria (Bock and Tait,  
230 2020). Mitochondria retain MitoTracker Deep Red even after loss of mitochondrial integrity;  
231 thus, mitochondria that have undergone MOMP are identifiable by loss of Omi and  
232 MitoTracker retention. Surprisingly, live-cell imaging of BCL-2 family protein knock-in cells  
233 treated following treatment with ABT-737 revealed that mitochondria (determined by  
234 MitoTracker positivity) that release Omi-GFP have higher levels of BCL-2, BCL-xL or MCL-1  
235 expression prior to MOMP (**Figure 5A-C**). Computational segmentation allowed us to  
236 distinguish BCL-2 family protein expression, which is spatially separate from the Omi signal,  
237 confirming that these mitochondria have indeed undergone minority MOMP. Quantification  
238 across a number of cells shows that mitochondria which undergo minority MOMP have  
239 increased BCL-2 family protein expression directly prior to membrane permeabilisation  
240 (**Figure 5D-F**). Furthermore, line scans revealed regions of the mitochondrial network with  
241 high BCL-2 family residency, but low Omi expression (**Supplementary Figure 4A, B**).  
242 Unexpectedly, these data reveal a correlation between increased anti-apoptotic BCL-2  
243 expression and selective mitochondrial permeabilisation. We reasoned that this may be  
244 analogous to increased apoptotic priming at the cellular level, where high anti-apoptotic BCL-  
245 2 expression can correlate with apoptotic sensitivity in some cell types. Mitochondrial  
246 association of pro-apoptotic BAX is indicative of increasing apoptotic priming (Edlich et al.,  
247 2011; Reichenbach et al., 2017; Schellenberg et al., 2013). To investigate whether  
248 mitochondria with high BCL-2 expression may also display high BAX expression (indicative of  
249 selective, increased apoptotic priming), we generated GFP-BAX expressing BCL-2 family  
250 knock-in HeLa cells and imaged them by super-resolution microscopy. In line with the notion  
251 that mitochondria with higher BCL-2 family expression also have elevated BAX expression,  
252 we observed BAX co-localising with high BCL-2 expressing mitochondria, indicative of

253 increased apoptotic priming (**Figure 5G-I**). These data demonstrate that inter-mitochondrial  
254 heterogeneity in anti-apoptotic BCL-2 expression and apoptotic priming underlies minority  
255 MOMP.

256

### 257 **Mitochondrial dysfunction inhibits BAX retrotranslocation promoting minority MOMP**

258 We aimed to define the underlying mechanism of mitochondrial intrinsic apoptotic  
259 priming. In healthy cells, BAX undergoes mitochondrial retrotranslocation and inhibiting this  
260 process causes BAX mitochondrial accumulation, sensitising to MOMP (Edlich et al., 2011;  
261 Schellenberg et al., 2013). Secondly, mitochondrial fusion promotes efficient oxidative  
262 phosphorylation, reducing heterogeneity in mitochondrial function (Chen et al., 2003). Given  
263 our previous data, we hypothesised that by impacting mitochondrial function, mitochondrial  
264 fission may promote BAX recruitment thereby facilitating minority MOMP. We imaged *Mfn1/2*  
265 <sup>-/-</sup> and *Mfn1*<sup>-/-</sup> MEF with MitoTracker Red, a potentiometric dye, that reports mitochondrial  $\Delta\psi^m$   
266 as a measure of mitochondrial function. Consistent with defective mitochondrial function,  
267 mitochondria in fusion defective cells (*Mfn1/2*<sup>-/-</sup>) displayed heterogenous MitoTracker Red  
268 signal and lower total signal than fusion competent *Mfn1*<sup>-/-</sup> MEF (**Figures 6A, 6B and 6C**). We  
269 next analysed GFP-BAX localisation in *Mfn1/2*<sup>-/-</sup> and *Mfn1*<sup>-/-</sup> MEF, using fluorescence loss in  
270 photobleaching (FLIP) to help visualise mitochondrial localised GFP-BAX. Analysis of GFP-  
271 BAX localisation revealed the presence of GFP-BAX on mitochondria specifically in *Mfn1/2*<sup>-/-</sup>  
272 cells (**Figure 6D, Movies 2, 3**). This suggests that mitochondrial dysfunction, a consequence  
273 of defective mitochondrial dynamics, may promote GFP-BAX mitochondrial accumulation,  
274 serving as an intrinsic priming mechanism. We next asked whether mitochondrial dysfunction  
275 affected BAX localisation. HeLa cells expressing GFP-BAX and iRFP-Omp25 were treated  
276 with the uncoupler carbonyl cyanide *m*-chlorophenyl hydrazone (CCCP) to induce  
277 mitochondrial dysfunction. To facilitate visualisation of mitochondrial localised GFP-BAX, cells  
278 were treated with digitonin to selectively permeabilise the plasma membrane, as described  
279 previously (Bender et al., 2012). Inducing mitochondrial dysfunction by CCCP treatment led  
280 to robust mitochondrial recruitment of GFP-BAX (**Figure 6E, Supplemental Figure 5A,**  
281 **Movies 4, 5**). Immunostaining of HeLa cells with the activation specific BAX antibody 6A7  
282 revealed BAX activation, as expected, under conditions of apoptosis (combined BH3-mimetic  
283 treatment) but not following CCCP treatment. We next measured BAX retrotranslocation rates  
284 following mitochondrial dysfunction. HeLa cells expressing GFP-BAX were treated with CCCP  
285 and retrotranslocation rates of GFP-BAX were measured by fluorescence loss in  
286 photobleaching (FLIP) (**Figures 6F and 6G, Movies 6, 7**). Re-localisation of GFP-BAX from  
287 mitochondria into the cytoplasm was reduced following CCCP treatment, demonstrating that  
288 mitochondrial dysfunction inhibits BAX retrotranslocation. These data reveal that loss of



289 mitochondrial function, by inhibiting BAX retrotranslocation, can serve as mitochondrial  
290 intrinsic priming signal facilitating minority MOMP.

291

## 292 **Discussion**

293 We describe that mitochondrial dysfunction, inducing mitochondrial fission, promotes  
294 DNA damage and genome instability. This process requires caspase activity, that is engaged  
295 by minority MOMP, in order to trigger DNA damage. Investigating the underlying mechanism,  
296 we find that mitochondrial dynamics affect inter-mitochondrial heterogeneity of anti-apoptotic  
297 BCL-2 expression, permitting increased apoptotic priming of fragmented mitochondria.  
298 Mitochondrial dysfunction acts as a mitochondrial intrinsic priming signal by inhibiting pro-  
299 apoptotic BAX retrotranslocation, promoting minority MOMP. Unexpectedly, by affecting  
300 mitochondrial BCL-2 heterogeneity and apoptotic priming, our data reveal crucial roles for  
301 mitochondrial dysfunction and dynamics in the regulation of minority MOMP leading to  
302 caspase dependent DNA damage and genome instability.

303

304 Our study highlights that mitochondrial dynamics are integral to minority MOMP,  
305 whereby mitochondrial fusion inhibits, and fission promotes this process. Consistent with this  
306 finding, the ability of sub-lethal apoptotic stress to engage oncogenic caspase-dependent DNA  
307 damage and genome instability was regulated in a similar manner. Moreover, we found in  
308 some cancer types, a correlation between the expression of the mitochondrial fission protein  
309 DRP1, DNA damage and mutational burden. These data support an oncogenic role for  
310 mitochondrial fission, through its capacity to promote minority MOMP and associated sub-  
311 lethal caspase activity. This also suggests that the multitude of cellular signalling pathways  
312 and stresses that impact mitochondrial dynamics, for instance as hypoxia or high glycolytic  
313 rates, might facilitate minority MOMP induced transformation (Chen and Chan, 2017; Wu et  
314 al., 2016). Indeed, we found that enforced mitochondrial fission (through MFN1/2 deletion),  
315 promoted minority MOMP induced transformation. Moreover, our study adds to the expanding  
316 interplay between mitochondrial dynamics and cancer (Chen and Chan, 2017; Gao et al.,  
317 2017; Kashatus et al., 2015; Serasinghe et al., 2015; Zhao et al., 2013).

318

319 We sought to define how mitochondrial dynamics might control minority MOMP.  
320 Surprisingly, we found extensive inter-mitochondrial heterogeneity in anti-apoptotic BCL-2  
321 expression. This heterogeneity was suppressed by mitochondrial fusion, most likely because  
322 mitochondrial fusion enables homogenous distribution of BCL-2 proteins across the  
323 mitochondrial network. As we further discuss, heterogeneity in anti-apoptotic BCL-2  
324 expression enables differences in apoptotic priming of specific mitochondria. Interestingly,  
325 during cell death, mitochondrial variation in pro-apoptotic BAK levels have previously been

326 found to influence the kinetics of MOMP (Weaver et al., 2014). Though myriad  
327 interconnections between mitochondrial dynamics and apoptosis exist, mitochondrial fission  
328 is largely considered a consequence of cell death. For instance, during apoptosis, extensive  
329 mitochondrial fragmentation occurs subsequent to MOMP (Bhola et al., 2009). By promoting  
330 homogenous BCL-2 expression across the mitochondrial network, our data reveal an indirect  
331 role for mitochondrial fusion in preventing minority MOMP.

332

333 We have previously found that ectopic expression of BCL-2 can lead to incomplete  
334 MOMP, consistent with BCL-2 anti-apoptotic function (Tait et al., 2010). In the current study,  
335 we find that increased expression of anti-apoptotic BCL-2 family proteins correlates with  
336 selective mitochondrial permeabilisation. While this may seem initially counter-intuitive,  
337 precedence for increased apoptotic priming, correlating with high anti-apoptotic BCL-2 levels  
338 is evident in various cancers (Certo et al., 2006; Singh et al., 2019). This is perhaps best  
339 demonstrated in high-BCL-2 expressing chronic lymphocytic leukaemia (CLL) that is often  
340 highly sensitive to the BCL-2 selective BH3-mimetic, venetoclax (Roberts et al., 2016). In  
341 healthy cells, BAX mitochondrial localisation is indicative of increased apoptotic priming  
342 (Edlich et al., 2011; Kuwana et al., 2020; Reichenbach et al., 2017; Schellenberg et al., 2013).  
343 Indeed, further investigation revealed that high pro-apoptotic BAX expression correlated with  
344 high-BCL-2 expression on intact mitochondria. Our data argue that heterogeneity in apoptotic  
345 priming exists not only between cell types, but also intracellularly, at the level of individual  
346 mitochondria.

347

348 Finally, we sought to understand how inter-mitochondrial heterogeneity in apoptotic  
349 priming might occur. Pro-apoptotic BAX is subject to constant mitochondrial retrotranslocation;  
350 inhibition of BAX retrotranslocation leads to mitochondrial accumulation, sensitising to  
351 apoptosis (Edlich et al., 2011; Schellenberg et al., 2013). We find that BAX retrotranslocation  
352 is inhibited under conditions of mitochondrial dysfunction, whereby reduction of mitochondrial  
353 inner membrane potential ( $\Delta\psi_m$ ) promotes BAX mitochondrial localisation. Importantly,  
354 reduction of  $\Delta\psi_m$ , provides a mitochondrial-intrinsic signal to increase apoptotic priming. In  
355 essence, BAX retrotranslocation may serve as a barometer of cellular metabolic health.  
356 Because loss of mitochondrial function causes mitochondrial fission, it promotes minority  
357 MOMP in a two-fold manner, segregating dysfunctional mitochondria and inhibiting BAX  
358 retrotranslocation (Twig et al., 2008). Further investigation will be required to mechanistically  
359 delineate how mitochondrial function regulates BAX retrotranslocation. Moreover, we consider  
360 it likely that additional mechanisms of mitochondrial-intrinsic priming also exist.

361

362 In summary, our findings that reveal that mitochondrial dynamics regulate DNA  
363 damage and genome instability via minority MOMP induced caspase-activity. This provides a  
364 mechanism linking mitochondrial dysfunction to pro-oncogenic DNA damage. Beyond pro-  
365 tumourigenic effects, minority MOMP has also been shown to have roles in innate immunity  
366 and inflammation, as such, our findings suggest new approaches to modulate minority MOMP  
367 and its downstream functions.

368

## 369 References

- 370 Bender, C.E., Fitzgerald, P., Tait, S.W., Llambi, F., McStay, G.P., Tupper, D.O., Pellettieri, J.,  
371 Sanchez Alvarado, A., Salvesen, G.S., and Green, D.R. (2012). Mitochondrial pathway of  
372 apoptosis is ancestral in metazoans. *Proc Natl Acad Sci U S A* *109*, 4904-4909.
- 373 Berthenet, K., Castillo Ferrer, C., Fanfone, D., Popgeorgiev, N., Neves, D., Bertolino, P.,  
374 Gibert, B., Hernandez-Vargas, H., and Ichim, G. (2020). Failed Apoptosis Enhances  
375 Melanoma Cancer Cell Aggressiveness. *Cell Rep* *31*, 107731.
- 376 Bholra, P.D., Mattheyses, A.L., and Simon, S.M. (2009). Spatial and temporal dynamics of  
377 mitochondrial membrane permeability waves during apoptosis. *Biophys J* *97*, 2222-2231.
- 378 Bock, F.J., and Tait, S.W.G. (2020). Mitochondria as multifaceted regulators of cell death. *Nat*  
379 *Rev Mol Cell Biol* *21*, 85-100.
- 380 Brokatzky, D., Dorflinger, B., Haimovici, A., Weber, A., Kirschnek, S., Vier, J., Metz, A.,  
381 Henschel, J., Steinfeldt, T., Gentle, I.E., *et al.* (2019). A non-death function of the mitochondrial  
382 apoptosis apparatus in immunity. *EMBO J* *38*.
- 383 Bukhari, H., and Muller, T. (2019). Endogenous Fluorescence Tagging by CRISPR. *Trends*  
384 *Cell Biol* *29*, 912-928.
- 385 Campbell, K.J., and Tait, S.W.G. (2018). Targeting BCL-2 regulated apoptosis in cancer.  
386 *Open Biol* *8*.
- 387 Cerami, E., Gao, J., Dogrusoz, U., Gross, B.E., Sumer, S.O., Aksoy, B.A., Jacobsen, A.,  
388 Byrne, C.J., Heuer, M.L., Larsson, E., *et al.* (2012). The cBio cancer genomics portal: an open  
389 platform for exploring multidimensional cancer genomics data. *Cancer Discov* *2*, 401-404.
- 390 Certo, M., Del Gaizo Moore, V., Nishino, M., Wei, G., Korsmeyer, S., Armstrong, S.A., and  
391 Letai, A. (2006). Mitochondria primed by death signals determine cellular addiction to  
392 antiapoptotic BCL-2 family members. *Cancer Cell* *9*, 351-365.
- 393 Chen, E.Y., Tan, C.M., Kou, Y., Duan, Q., Wang, Z., Meirelles, G.V., Clark, N.R., and Ma'ayan,  
394 A. (2013). Enrichr: interactive and collaborative HTML5 gene list enrichment analysis tool.  
395 *BMC Bioinformatics* *14*, 128.
- 396 Chen, H., and Chan, D.C. (2017). Mitochondrial Dynamics in Regulating the Unique  
397 Phenotypes of Cancer and Stem Cells. *Cell Metab* *26*, 39-48.
- 398 Chen, H., Detmer, S.A., Ewald, A.J., Griffin, E.E., Fraser, S.E., and Chan, D.C. (2003).  
399 Mitofusins Mfn1 and Mfn2 coordinately regulate mitochondrial fusion and are essential for  
400 embryonic development. *J Cell Biol* *160*, 189-200.
- 401 Edlich, F., Banerjee, S., Suzuki, M., Cleland, M.M., Arnoult, D., Wang, C., Neutzner, A.,  
402 Tjandra, N., and Youle, R.J. (2011). Bcl-x(L) retrotranslocates Bax from the mitochondria into  
403 the cytosol. *Cell* *145*, 104-116.
- 404 Frank, S., Gaume, B., Bergmann-Leitner, E.S., Leitner, W.W., Robert, E.G., Catez, F., Smith,  
405 C.L., and Youle, R.J. (2001). The role of dynamin-related protein 1, a mediator of mitochondrial  
406 fission, in apoptosis. *Dev Cell* *1*, 515-525.
- 407 Gao, J., Aksoy, B.A., Dogrusoz, U., Dresdner, G., Gross, B., Sumer, S.O., Sun, Y., Jacobsen,  
408 A., Sinha, R., Larsson, E., *et al.* (2013). Integrative analysis of complex cancer genomics and  
409 clinical profiles using the cBioPortal. *Sci Signal* *6*, pl1.
- 410 Gao, Z., Li, Y., Wang, F., Huang, T., Fan, K., Zhang, Y., Zhong, J., Cao, Q., Chao, T., Jia, J.,  
411 *et al.* (2017). Mitochondrial dynamics controls anti-tumour innate immunity by regulating CHIP-  
412 IRF1 axis stability. *Nat Commun* *8*, 1805.



413 Giampazolias, E., and Tait, S.W. (2016). Mitochondria and the hallmarks of cancer. *FEBS J*  
414 283, 803-814.

415 Goldstein, J.C., Waterhouse, N.J., Juin, P., Evan, G.I., and Green, D.R. (2000). The  
416 coordinate release of cytochrome c during apoptosis is rapid, complete and kinetically  
417 invariant. *Nat Cell Biol* 2, 156-162.

418 Gorelick, A.N., Kim, M., Chatila, W.K., La, K., Hakimi, A.A., Berger, M.F., Taylor, B.S.,  
419 Gammage, P.A., and Reznik, E. (2021). Respiratory complex and tissue lineage drive  
420 recurrent mutations in tumour mtDNA. *Nat Metab* 3, 558-570.

421 Ichim, G., Lopez, J., Ahmed, S.U., Muthalagu, N., Giampazolias, E., Delgado, M.E., Haller,  
422 M., Riley, J.S., Mason, S.M., Athineos, D., *et al.* (2015). Limited mitochondrial permeabilization  
423 causes DNA damage and genomic instability in the absence of cell death. *Mol Cell* 57, 860-  
424 872.

425 Ichim, G., and Tait, S.W. (2016). A fate worse than death: apoptosis as an oncogenic process.  
426 *Nat Rev Cancer* 16, 539-548.

427 Isaacs, J.S., Jung, Y.J., Mole, D.R., Lee, S., Torres-Cabala, C., Chung, Y.L., Merino, M.,  
428 Trepel, J., Zbar, B., Toro, J., *et al.* (2005). HIF overexpression correlates with biallelic loss of  
429 fumarate hydratase in renal cancer: novel role of fumarate in regulation of HIF stability. *Cancer*  
430 *Cell* 8, 143-153.

431 Ishihara, N., Nomura, M., Jofuku, A., Kato, H., Suzuki, S.O., Masuda, K., Otera, H., Nakanishi,  
432 Y., Nonaka, I., Goto, Y., *et al.* (2009). Mitochondrial fission factor Drp1 is essential for  
433 embryonic development and synapse formation in mice. *Nat Cell Biol* 11, 958-966.

434 Kashatus, J.A., Nascimento, A., Myers, L.J., Sher, A., Byrne, F.L., Hoehn, K.L., Counter, C.M.,  
435 and Kashatus, D.F. (2015). Erk2 phosphorylation of Drp1 promotes mitochondrial fission and  
436 MAPK-driven tumor growth. *Mol Cell* 57, 537-551.

437 Kuleshov, M.V., Jones, M.R., Rouillard, A.D., Fernandez, N.F., Duan, Q., Wang, Z., Koplev,  
438 S., Jenkins, S.L., Jagodnik, K.M., Lachmann, A., *et al.* (2016). Enrichr: a comprehensive gene  
439 set enrichment analysis web server 2016 update. *Nucleic Acids Res* 44, W90-97.

440 Kuwana, T., King, L.E., Cosentino, K., Suess, J., Garcia-Saez, A.J., Gilmore, A.P., and  
441 Newmeyer, D.D. (2020). Mitochondrial residence of the apoptosis inducer BAX is more  
442 important than BAX oligomerization in promoting membrane permeabilization. *J Biol Chem*  
443 295, 1623-1636.

444 Lartigue, L., Kushnareva, Y., Seong, Y., Lin, H., Faustin, B., and Newmeyer, D.D. (2009).  
445 Caspase-independent mitochondrial cell death results from loss of respiration, not cytotoxic  
446 protein release. *Mol Biol Cell* 20, 4871-4884.

447 Lovric, M.M., and Hawkins, C.J. (2010). TRAIL treatment provokes mutations in surviving  
448 cells. *Oncogene* 29, 5048-5060.

449 Oltersdorf, T., Elmore, S.W., Shoemaker, A.R., Armstrong, R.C., Augeri, D.J., Belli, B.A.,  
450 Bruncko, M., Deckwerth, T.L., Dinges, J., Hajduk, P.J., *et al.* (2005). An inhibitor of Bcl-2 family  
451 proteins induces regression of solid tumours. *Nature* 435, 677-681.

452 Pollard, P.J., Spencer-Dene, B., Shukla, D., Howarth, K., Nye, E., El-Bahrawy, M.,  
453 Deheragoda, M., Joannou, M., McDonald, S., Martin, A., *et al.* (2007). Targeted inactivation  
454 of fh1 causes proliferative renal cyst development and activation of the hypoxia pathway.  
455 *Cancer Cell* 11, 311-319.

456 Rehm, M., Dussmann, H., and Prehn, J.H. (2003). Real-time single cell analysis of  
457 Smac/DIABLO release during apoptosis. *J Cell Biol* 162, 1031-1043.

458 Reichenbach, F., Wiedenmann, C., Schalk, E., Becker, D., Funk, K., Scholz-Kreisel, P., Todt,  
459 F., Wolleschak, D., Dohner, K., Marquardt, J.U., *et al.* (2017). Mitochondrial BAX Determines  
460 the Predisposition to Apoptosis in Human AML. *Clin Cancer Res* 23, 4805-4816.

461 Roberts, A.W., Davids, M.S., Pagel, J.M., Kahl, B.S., Puvvada, S.D., Gerecitano, J.F., Kipps,  
462 T.J., Anderson, M.A., Brown, J.R., Gressick, L., *et al.* (2016). Targeting BCL2 with Venetoclax  
463 in Relapsed Chronic Lymphocytic Leukemia. *N Engl J Med* 374, 311-322.

464 Schellenberg, B., Wang, P., Keeble, J.A., Rodriguez-Enriquez, R., Walker, S., Owens, T.W.,  
465 Foster, F., Taniaris-Hughes, J., Brennan, K., Streuli, C.H., *et al.* (2013). Bax exists in a  
466 dynamic equilibrium between the cytosol and mitochondria to control apoptotic priming. *Mol*  
467 *Cell* 49, 959-971.

468 Sciacovelli, M., Goncalves, E., Johnson, T.I., Zecchini, V.R., da Costa, A.S., Gaude, E.,  
469 Drubbel, A.V., Theobald, S.J., Abbo, S.R., Tran, M.G., *et al.* (2016). Fumarate is an epigenetic  
470 modifier that elicits epithelial-to-mesenchymal transition. *Nature* 537, 544-547.  
471 Selak, M.A., Armour, S.M., MacKenzie, E.D., Boulahbel, H., Watson, D.G., Mansfield, K.D.,  
472 Pan, Y., Simon, M.C., Thompson, C.B., and Gottlieb, E. (2005). Succinate links TCA cycle  
473 dysfunction to oncogenesis by inhibiting HIF- $\alpha$  prolyl hydroxylase. *Cancer Cell* 7, 77-85.  
474 Serasinghe, M.N., Wieder, S.Y., Renault, T.T., Elkholi, R., Ascioffa, J.J., Yao, J.L., Jabado,  
475 O., Hoehn, K., Kageyama, Y., Sesaki, H., *et al.* (2015). Mitochondrial division is requisite to  
476 RAS-induced transformation and targeted by oncogenic MAPK pathway inhibitors. *Mol Cell*  
477 57, 521-536.  
478 Singh, R., Letai, A., and Sarosiek, K. (2019). Regulation of apoptosis in health and disease:  
479 the balancing act of BCL-2 family proteins. *Nat Rev Mol Cell Biol* 20, 175-193.  
480 Smith, A.L., Whitehall, J.C., Bradshaw, C., Gay, D., Robertson, F., Blain, A.P., Hudson, G.,  
481 Pyle, A., Houghton, D., Hunt, M., *et al.* (2020). Age-associated mitochondrial DNA mutations  
482 cause metabolic remodelling that contributes to accelerated intestinal tumorigenesis. *Nat*  
483 *Cancer* 1, 976-989.  
484 Stewart-Ornstein, J., and Lahav, G. (2016). Dynamics of CDKN1A in Single Cells Defined by  
485 an Endogenous Fluorescent Tagging Toolkit. *Cell Rep* 14, 1800-1811.  
486 Tait, S.W., Parsons, M.J., Llambi, F., Bouchier-Hayes, L., Connell, S., Munoz-Pinedo, C., and  
487 Green, D.R. (2010). Resistance to caspase-independent cell death requires persistence of  
488 intact mitochondria. *Dev Cell* 18, 802-813.  
489 Tigano, M., Vargas, D.C., Tremblay-Belzile, S., Fu, Y., and Sfeir, A. (2021). Nuclear sensing  
490 of breaks in mitochondrial DNA enhances immune surveillance. *Nature* 591, 477-481.  
491 Twig, G., Elorza, A., Molina, A.J., Mohamed, H., Wikstrom, J.D., Walzer, G., Stiles, L., Haigh,  
492 S.E., Katz, S., Las, G., *et al.* (2008). Fission and selective fusion govern mitochondrial  
493 segregation and elimination by autophagy. *EMBO J* 27, 433-446.  
494 Valente, A.J., Maddalena, L.A., Robb, E.L., Moradi, F., and Stuart, J.A. (2017). A simple  
495 ImageJ macro tool for analyzing mitochondrial network morphology in mammalian cell culture.  
496 *Acta Histochem* 119, 315-326.  
497 Wahl, G.M., Padgett, R.A., and Stark, G.R. (1979). Gene amplification causes overproduction  
498 of the first three enzymes of UMP synthesis in N-(phosphonacetyl)-L-aspartate-resistant  
499 hamster cells. *J Biol Chem* 254, 8679-8689.  
500 Wakabayashi, J., Zhang, Z., Wakabayashi, N., Tamura, Y., Fukaya, M., Kensler, T.W., Iijima,  
501 M., and Sesaki, H. (2009). The dynamin-related GTPase Drp1 is required for embryonic and  
502 brain development in mice. *J Cell Biol* 186, 805-816.  
503 Weaver, D., Eisner, V., Liu, X., Varnai, P., Hunyady, L., Gross, A., and Hajnoczky, G. (2014).  
504 Distribution and apoptotic function of outer membrane proteins depend on mitochondrial  
505 fusion. *Mol Cell* 54, 870-878.  
506 Wu, W., Lin, C., Wu, K., Jiang, L., Wang, X., Li, W., Zhuang, H., Zhang, X., Chen, H., Li, S.,  
507 *et al.* (2016). FUNDC1 regulates mitochondrial dynamics at the ER-mitochondrial contact site  
508 under hypoxic conditions. *EMBO J* 35, 1368-1384.  
509 Zhao, J., Zhang, J., Yu, M., Xie, Y., Huang, Y., Wolff, D.W., Abel, P.W., and Tu, Y. (2013).  
510 Mitochondrial dynamics regulates migration and invasion of breast cancer cells. *Oncogene*  
511 32, 4814-4824.

512

513

514

515 **Methods**

516

517 **Cell Lines**

518 HeLa and U2OS cells were purchased from ATCC (LGC Standards). 293FT cells were  
519 purchased from Thermo Fisher Scientific.

520

521 MFN1/2<sup>-/-</sup> MEF were provided by David Chan, Caltech and reconstituted with LZRS-MFN2 in  
522 our laboratory. Drp1<sup>fl/fl</sup> MEF were provided by Hiromi Sesaki, Johns Hopkins University School  
523 of Medicine. All cell lines were cultured in DMEM high-glucose medium supplemented with  
524 10% FCS, 2 mM glutamine, 1 mM sodium pyruvate, penicillin (10,000 units/ml) and  
525 streptomycin (10,000 units/ml).

526

527 To delete Drp1 from *Drp1*<sup>fl/fl</sup> MEF, 2 x 10<sup>6</sup> cells were seeded and infected with 200 MOI high  
528 titre Ad5CMVCre (Viral Vector Core, University of Iowa) for 8 h, after which the media was  
529 replaced. Cells were used for experiments from the following day.

530

## 531 **METHOD DETAILS**

532

### 533 **Generation of Scarlet-BCL-2 knock-in cell lines**

534 We used a modified version of the knock-in strategy described in (Stewart-Ornstein and  
535 Lahav, 2016). Two vectors were used: the first vector comprises 500bp homology arm before  
536 and after the start codon of BCL-2, in between which is the Scarlet coding sequence, cloned  
537 into pUC-SP. The second vector, pSpCas9(BB)-2A-Puro (Addgene #48139) comprises Cas9  
538 and the sgRNA targeting sequence. The following sgRNA sequences were used

539 Human BCL-2            5'- ATGGCGCACGCTGGGAGAAC -3'

540 Human BCL-xL           5- AAAAATGTCTCAGAGCAACC -3'

541 Human MCL-1           5'- CGGCGGCGACTGGCAATGTT -3'

542

543 To generate the knock-in cells, HeLa cells were transfected with 1 µg of homology arm vector  
544 and 1 µg of pSpCas9(BB)-2A-Puro with Lipofectamine 2000, according to the manufacturers  
545 instructions. Media was removed 5 h later, and replaced with media containing 1 µM SCR7  
546 for 2 days. Cells were selected with 1 µg/mL puromycin for a further two days before selecting  
547 Scarlet positive clones by FACS. Cells which expressed Scarlet signal which co-localised with  
548 mitochondria we used for further experiments.

549

### 550 **Generation of stable overexpressing cell lines**

551 For retroviral transduction, 293FT cells were transfected with 5 µg of plasmid, together with  
552 1.2 µg gag/pol (Addgene #14887) and 2.4 µg VSVG (Addgene #8454) using Lipofectamine  
553 2000. Media was changed after 6 hours and collected, filtered and used to infect cells 24 and  
554 48 h post-transfection in the presence of 1 µg/ml Polybrene. 24 h following infection, cells

555 were allowed to recover in fresh medium and incubated with selection antibiotic 24 h after.  
556 Cells were selected with appropriate antibiotic or FACS sorted to isolate a high-expressing  
557 population. Concentrations used for antibiotic selection were 200 µg/ml zeocin (Invivogen) or  
558 1 µg/ml puromycin (Sigma)

559

560 For lentiviral transduction, the procedure was the same as for retroviral transduction, except 5  
561 µg plasmid was transfected into 293FT along with 1.86 µg psPAX2 (Addgene #12260) and 1  
562 µg VSVG (Addgene #8454) using Lipofectamine 2000.

563

#### 564 **Generation of CRISPR knock-out cell lines**

565 Human Drp1 and mouse Dff40 knock-out cell lines were generated by CRISPR-Cas9 gene  
566 deletion, using the lentiviral transduction protocol above. The following sequences were  
567 cloned into LentiCRISPRv2-puro (Addgene #52961)

568 Human Drp1: 5'- AAATCAGAGAGCTCATTCTT – 3'

569 Mouse Dff40: 5'- ACATGGAGCCAAGGACTCGC -3'

570

#### 571 **Plasmids**

572 LZRS-Drp1 was generated by cloning the Drp1 coding sequence from pcDNA3.1(+) Drp1  
573 (Addgene #34706) into LZRS backbone using Gibson Assembly. pBABE iRFP-Omp25 was  
574 cloned by Gibson Assembly using fragments derived from pLJM2 SNAP-Omp25 (Addgene  
575 #69599) and pMito-iRFP670 (Addgene #45462). Omi-GFP (in eGFPN2) was a kind gift from  
576 Douglas Green, St. Jude Children's Research Hospital

577

#### 578 **Western Blotting**

579 Cells were collected and lysed in NP-40 lysis buffer (1% NP-40, 1 mM EDTA, 150 mM NaCl,  
580 50 mM Tris-Cl pH 7.4) supplemented with complete protease inhibitor (Roche). Protein  
581 concentration of cleared lysates was determined by Bradford assay (Bio-Rad). Equal amounts  
582 of protein lysates were subjected to electrophoresis through 10 or 12% SDS-PAGE gels and  
583 transferred onto nitrocellulose membranes, which were blocked for 1 h in 5% milk/PBS-Tween  
584 at room temperature. Membranes were incubated with primary antibody overnight at 4°C  
585 overnight. After washing, membranes were incubated with either goat-anti-rabbit Alexa Fluor  
586 800, goat-anti-mouse Alexa Fluor 680 or goat-anti-rat DyLight 800 for 1 h at room temperature  
587 before detection using a Li-Cor Odyssey CLx (Li-Cor).

588

#### 589 **Flow Cytometry**

590 For measuring levels of γH2AX, cells were trypsinised and washed once with PBS and fixed  
591 in 4% PFA for 15 minutes at room temperature. After washing once in PBS, cells were

592 resuspended in 300  $\mu$ L and 700  $\mu$ L cold ethanol added dropwise while slowly vortexing.  
593 Samples were frozen at -20°C overnight. The following day, samples were washed with PBS  
594 and blocked in 2% BSA in PBS for 1 h at room temperature and incubated with anti- $\gamma$ H2AX  
595 antibody conjugated to Alexa Fluor 647 (Biolegend) for 30 minutes protected from light.  
596 Samples were analysed on the BD LSRFortessa flow cytometer (BD Biosciences) using  
597 standard protocols.

598  
599 To measure mitochondrial potential in *Mfn1/2*<sup>-/-</sup> and *Mfn1*<sup>-/-</sup> MEF, cells were incubated with  
600 50nM MitoTracker CMXRos (Thermo Fisher Scientific) for 15 mins before collection. Cells  
601 were analysed on a Attune NxT flow cytometer (Thermo Fisher Scientific) using standard  
602 protocols, and analysed in FlowJo (BD).

603

#### 604 **PALA Assay and Cad Genomic Amplification**

605 Cells were seeded in triplicate in 6 well plates at a density of 2500 cells per well and cultured  
606 in nucleoside-free  $\alpha$ -MEM medium supplemented with 10% dialysed FBS. PALA was added  
607 at the LD<sub>50</sub> dose and cells maintained until visible colonies formed. Colonies were fixed and  
608 stained in methylene blue (1% methylene blue in 50:50 methanol:water).

609

610 To assay Cad genomic amplification, DNA was extracted from PALA resistant colonies, or, in  
611 the case of control treated cells where no colonies were viable, DNA was extracted from cells  
612 passaged twenty times in DMSO, but not subjected to PALA treatment.

613

#### 614 **Anchorage-independent growth assay**

615 A 1% base low melting temperature agarose solution (Sigma-Aldrich) was added to 6 well  
616 plates and allowed to set. 7,500 cells were suspended in 0.6% agarose in a 1:1: ratio to  
617 achieve a final concentration of 0.3% agarose., which was added on top of base agarose.  
618 When set, the cell/agarose mix was overlaid with complete DMEM media and colonies  
619 counted 14 days later.

620

#### 621 **q-PCR**

622 Genomic DNA was isolated from cells using the GeneJET DNA Extraction Kit (Thermo Fisher  
623 Scientific). PCR was performed on a Bio-Rad C1000 Thermal Cycler using the following  
624 conditions: 3 min at 95°C, 40 cycles of 20 s at 95°C, 30 s at 57°C, 30 s at 72°C and a final 5  
625 min at 72°C using Brilliant III Ultra-Fast SYBR Green qPCR Master Mix (Agilent  
626 Technologies). Relative DNA quantification was analysed by the 2<sup>- $\Delta\Delta$ Ct</sup> method. Primer  
627 sequences used are as follows:

628 Mouse CAD-F            AAGCTCAGATCCTAGTGCTAACG



629 Mouse CAD-R CCGTAGTTGCCGATGAGAGG  
630 Mouse 18S-F ATGGTAGTCGCCGTGCCTAC  
631 Mouse 18S-R CCGGAATCGAACCCCTGATT

632

### 633 **Microscopy**

#### 634 ***Fixed cell imaging***

635 Cells were grown on coverslips and fixed in 4% PFA/PBS for 10 min, followed by  
636 permeabilization in 0.2% Triton-X-100/PBS for 15 min. Cells were blocked for 1 h in 2%  
637 BSA/PBS and incubated with primary antibodies overnight at 4°C in a humidified chamber.  
638 The following day, cells were washed in PBS and secondary antibodies added for 1 h at room  
639 temperature, before final wash steps and mounting in Vectashield antifade mounting media.

640

#### 641 ***MOMP assay***

642 Cells were transfected with 250ng CytoGFP and 250ng mito-mCherry for 16 h with either  
643 Lipofectamine 2000 or GeneJuice before treatment in combination with 50 nM A/C  
644 heterodimerizer (Clontech). Minority MOMP was scored based on co-localisation of CytoGFP  
645 with mito-mCherry.

646

#### 647 ***Airyscan super-resolution imaging***

648 Super-resolution Airyscan images were acquired on a Zeiss LSM 880 with Airyscan  
649 microscope (Carl Zeiss). Data were collected using a 63 x 1.4 NA objective for the majority of  
650 experiments, although some were acquired using a 40 x 1.3 NA objective. 405nm, 561nm and  
651 640 nm laser lines were used, in addition to a multi-line argon laser (488nm) and images  
652 acquired sequentially using the optimal resolution determined by the Zeiss ZEN software.  
653 When acquiring z-stacks, the software-recommend slice size was used. Live-cell experiments  
654 were performed in an environmental chamber at 37°C and 5% CO<sub>2</sub>. Airyscan processing was  
655 performed using the Airyscan processing function in the ZEN software, and to maintain clarity  
656 some images have been pseudocoloured and brightness and contrast altered in FIJI (ImageJ  
657 v2.0.0).

658

#### 659 ***Nikon A1R imaging***

660 Confocal images were acquired on a Nikon A1R microscope (Nikon). Data were collected  
661 using a 60 x Plan Apo VC Oil DIC N2 objective. 405nm, 561nm, 638nm laser lines were used,  
662 in addition to a multi-line argon laser (488nm). Images were acquired sequentially to avoid  
663 bleedthrough. For live-cell imaging, cells were imaged in a humidified environmental chamber  
664 at 37°C and 5% CO<sub>2</sub>. Images were minimally processed in FIJI (ImageJ v2.0.0) to adjust  
665 brightness and contrast.

666

### 667 **3D rendering and image analysis**

668 Z-stacks acquired on the Zeiss LSM 880 with Airyscan microscope were imported into Imaris  
669 (Bitplane, Switzerland). To segment Omi and BCL-2, a surface was created using the Omi-  
670 GFP pixel information. Masks were applied to differentiate between BCL-2 inside and outside  
671 the Omi surface. From these masks, spots were created from the BCL-2 channel and  
672 quantified based on intensity of BCL-2 on mitochondria undergoing minority MOMP.

673

### 674 **Fluorescence Loss in Photobleaching**

675 Two images were acquired before a region of interest (indicated in each figure) which  
676 overlapped the cytosol and the nucleus was bleached for 15 iterations. Photobleaching took  
677 approximately 30 seconds after which images were acquired every 15 seconds. Standard  
678 deviation of GFP-BAX signal in the cytosol was quantified using the ROI manager in FIJI and  
679 normalised.

680

### 681 **Digitonin permeabilisation**

682 Prior to digitonin permeabilisation, cells were incubated in FluoroBrite DMEM without FBS. To  
683 permeabilise the plasma membrane, 20  $\mu$ M digitonin (Sigma) was added and cells imaged  
684 immediately.

685

### 686 **Mitochondrial analysis**

687 Cells stained with MitoTracker Green (100 nM) or MitoTracker Deep Red (100 nM) were  
688 imaged on the Zeiss LSM 880 with Airyscan or Nikon A1R. These images were analysed using  
689 the ImageJ plugin Mitochondrial Network Analysis (MiNA) as previously described (Valente et  
690 al., 2017). Heterogeneity of BCL-2 expression was measured by calculating the standard  
691 deviation of Scarlet and GFP signals in mitochondrial regions in FIJI (ImageJ v2.0.0).

692

### 693 **Live-cell viability assays**

694 Cell viability was assayed using either an IncuCyte ZOOM or IncuCyte S3 imaging system  
695 (Sartorius). Cells were seeded overnight and drugged in the presence of 30 nM SYTOX Green  
696 (Thermo Fisher Scientific), which is a non-cell-permeable nuclear stain. Data were analysed  
697 in the IncuCyte software, and where different cell lines are compared the data are normalised  
698 to starting confluency.

699

### 700 **Bioinformatic Analysis**

701 Relationship between DRP1 (*DNM1L*) expression and mutational count were investigated in  
702 TCGA PanCancer Atlas studies through cBioportal (Cerami et al., 2012; Gao et al., 2013).

703 Studies with greater than 100 samples were analysed and samples divided into quartiles of  
704 *DNM1L*: mRNA expression z-scores relative to diploid samples (RNA Seq V2 RSEM). Of  
705 these, a significant association between increased mutational count in *DNM1L* mRNA highest  
706 quartile versus *DNM1L* mRNA lowest quartile was found in 2 out of 22 studies with the inverse  
707 relationship not observed in any cancer type. Mutation count in *DNM1L* quartiles was viewed  
708 in the Clinical Tab, statistical analysis of mutation count was performed by cBioportal,  
709 Wilcoxon test, q-value <0.05 was considered significant. As the relationship between *DNM1L*  
710 and mutational count was highly significant in Invasive Breast Carcinoma and Non-Small Cell  
711 Lung Cancer, we used these studies for further interrogation with cases of Lung  
712 adenocarcinoma selected from Non-Small Cell Lung Cancer dataset (not Lung squamous cell  
713 carcinoma). Data were downloaded from cBioportal and mutational count in *DNM1L* mRNA  
714 highest quartile versus *DNM1L* mRNA lowest quartile (mRNA expression z-scores relative to  
715 diploid samples (RNA Seq V2 RSEM)) plotted in GraphPad Prism Version 9.0.0 and statistical  
716 significance between groups calculated by Mann-Whitney test. Data points represent  
717 individual patient samples, bar is mean +SD. *DNM1L* quartiles each contain 128 samples  
718 (Lung Adenocarcinoma TCGA PanCancer Atlas dataset) or 271 samples (Breast Invasive  
719 Carcinoma TCGA PanCancer Atlas dataset). Differentially expressed proteins in *DNM1L*  
720 highest versus lowest quartiles were also determined in cBioportal (measured by reverse-  
721 phase protein array, Z-scores) where significant differences are determined by Student's t-  
722 test (p value) and Benjamini-Hochberg procedure (q value). Pathway analysis was performed  
723 using gene names of proteins identified with significantly higher expression in *DNM1L* high  
724 versus *DNM1L* low quartiles (excluding phospho-specific proteins, see lists in Supplementary  
725 Table 1) in GO Biological Process 2018 through Enrichr (Chen et al., 2013; Kuleshov et al.,  
726 2016).

## 727 **Acknowledgements**

728 Funding for this work was from Cancer Research UK Programme Foundation Award  
729 (A20145; SWGT). We thank Douglas Green (St. Jude Children's Research Hospital), and  
730 Hiromi Sesaki (Johns Hopkins University) for reagents. We also thank Margaret O'Prey, Nikki  
731 Paul, Peter Thomason and Tom Gilbey (Beatson Institute) for excellent technical assistance,  
732 Catherine Winchester (Beatson Institute), Douglas Green and members of the Tait laboratory  
733 for critical reading of the manuscript.

## 734 *Author contributions*

735 KC, JSR and SWGT conceived the study and designed the workplan. Experimental  
736 work: KC, JSR, CC, YE, KJC Development and contribution of reagents: KC, JSR, CC, GI.  
737 Data analysis: KC, JSR, YE, KJC, SWGT Intellectual input: KC, JSR, KJC, SWGT Manuscript  
738 writing: JSR and SWGT.

739



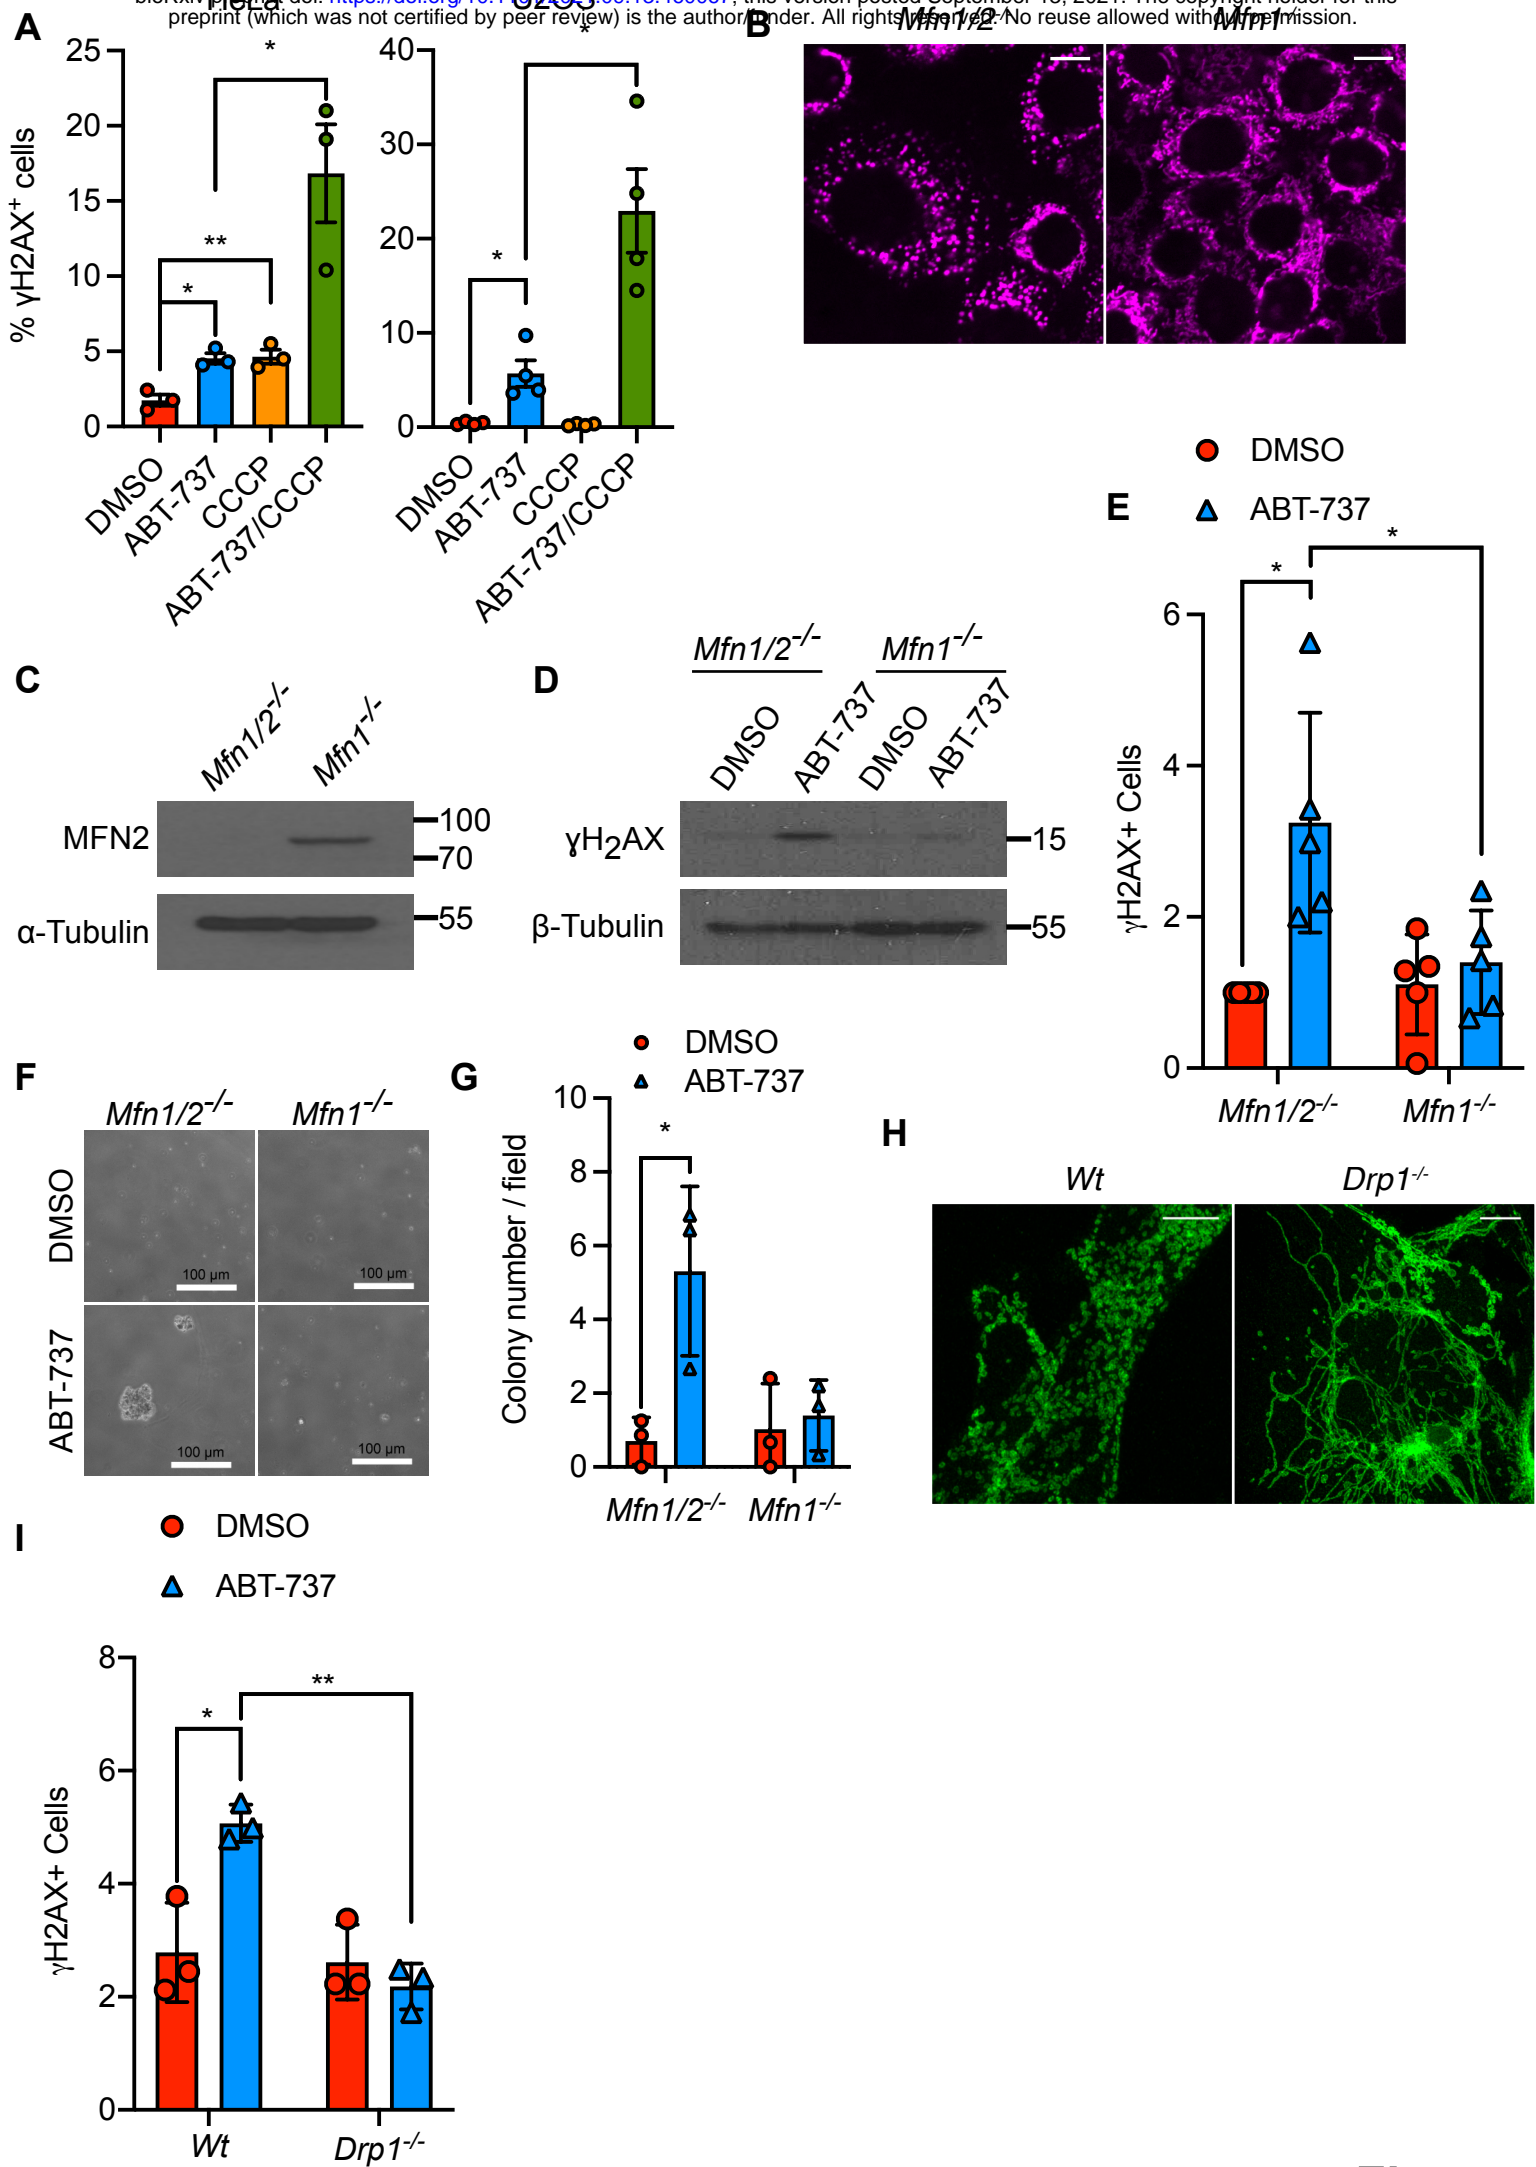

**Figure 1**

740 **Figure 1 Mitochondrial dynamics regulate DNA damage**

- 741 A) Flow cytometric analysis of HeLa and U2OS cells treated with 10  $\mu$ M CCCP for 30 min  
742 before treatment with 10  $\mu$ M ABT-737 for 3 h. Cells were immunostained with anti-  
743  $\gamma$ H2AX antibody. Data represented as mean  $\pm$  SEM from 3 independent experiments.  
744 B) Airyscan images of *Mfn1/2*<sup>-/-</sup> and *Mfn1*<sup>-/-</sup> MEF, immunostained with anti-TOM20  
745 antibody. Scale bar = 10  $\mu$ m.  
746 C) Immunoblot of MFN2 in *Mfn1/2*<sup>-/-</sup> and *Mfn1*<sup>-/-</sup> MEF.  
747 D)  $\gamma$ H2AX expression in *Mfn1/2*<sup>-/-</sup> and *Mfn1*<sup>-/-</sup> MEF treated with 10  $\mu$ M ABT-737 for 3 h.  
748 E) Flow cytometric analysis of  $\gamma$ H2AX expression in *Mfn1/2*<sup>-/-</sup> and *Mfn1*<sup>-/-</sup> MEF treated with  
749 10  $\mu$ M ABT-737 for 3 h. Data represented as mean  $\pm$  SEM from 5 independent  
750 experiments.  
751 F) *Mfn1/2*<sup>-/-</sup> and *Mfn1*<sup>-/-</sup> MEF were cultured for twenty passages in 10  $\mu$ M ABT-737 and  
752 their anchorage-independent growth assessed by soft agar assay. Representative  
753 images from 3 independent experiments shown.  
754 G) Quantification of anchorage-independent growth in soft agar from (D). Data are  
755 expressed as mean  $\pm$  SD from 3 independent experiments and analysed using  
756 student's t-test.  
757 H) Airyscan images of *Drp1*<sup>fl/fl</sup> MEF infected with AdCre and immunostained with anti-  
758 TOM20 antibody. Scale bar = 10  $\mu$ m.  
759 I) Flow cytometric analysis of  $\gamma$ H2AX expression in Wt and *Drp1*<sup>fl/fl</sup> MEF treated with 10  
760  $\mu$ M ABT-737 for 3 h. Data are expressed at mean  $\pm$  SEM from 3 independent  
761 experiments and analysed using student's t-test.  
762  
763

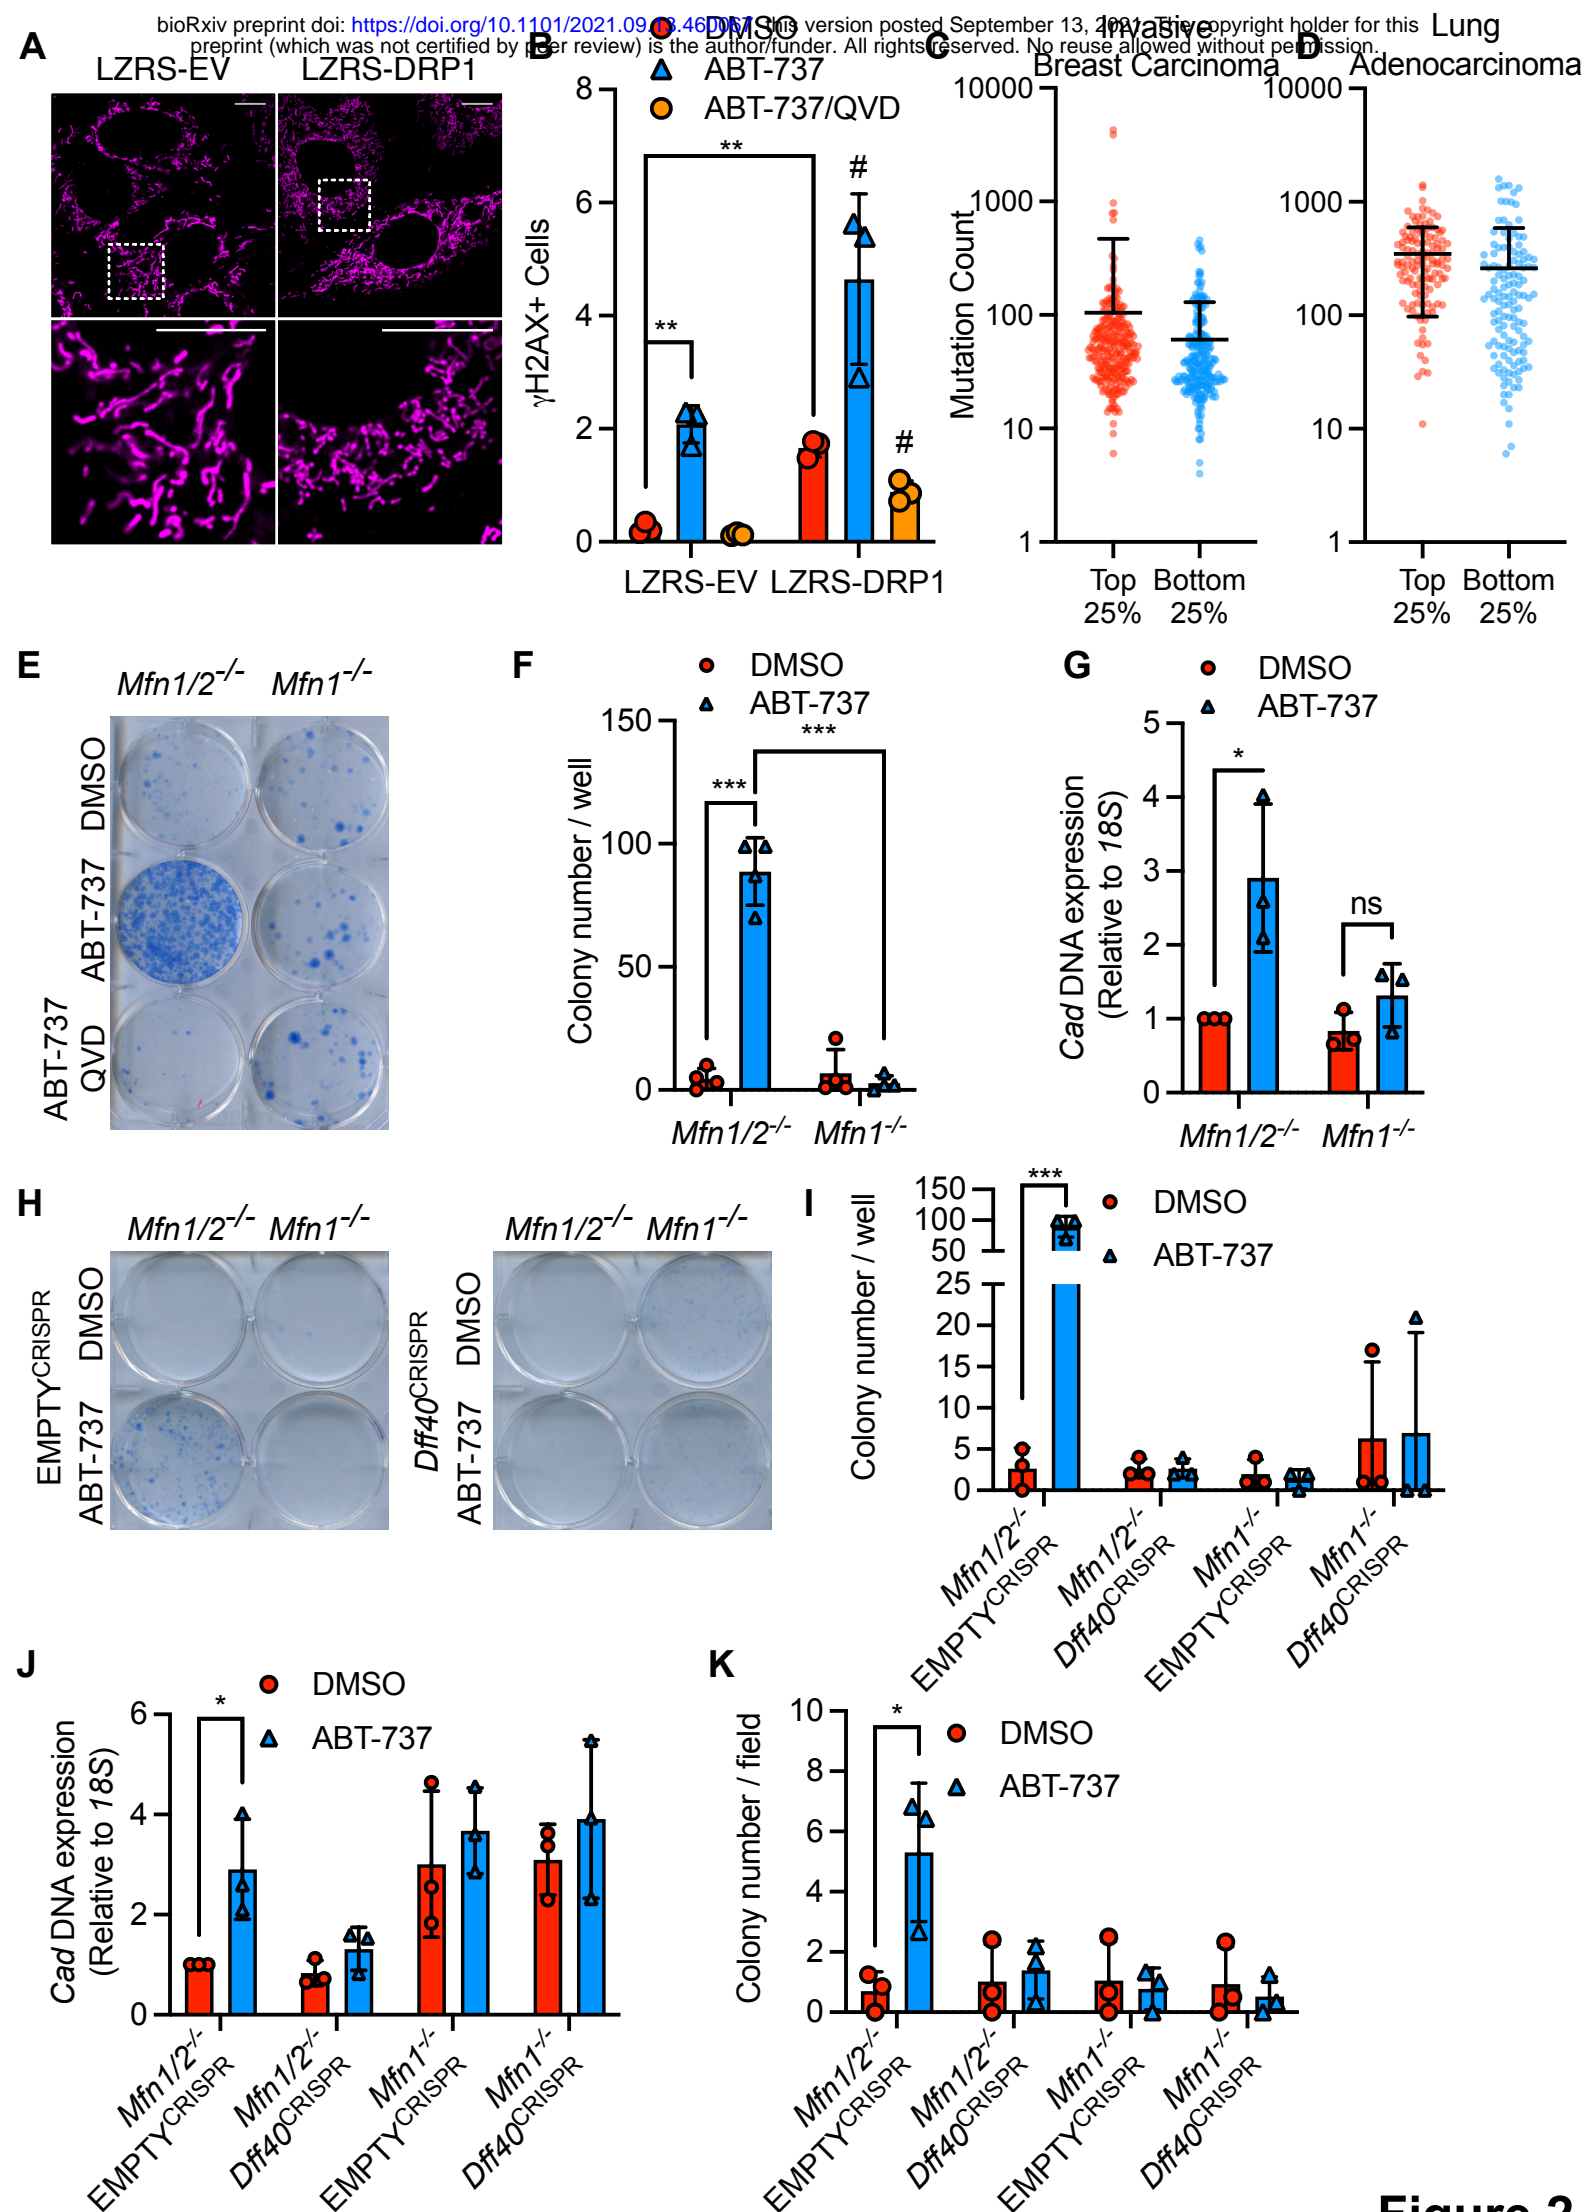

Figure 2

764 **Figure 2 Mitochondrial dynamics regulate DNA damage and genome-instability in a**  
765 **caspace and CAD dependent manner**  
766

- 767 A) Airyscan images of MEF overexpressing LZRS-DRP1 or LZRS empty vector, stained  
768 with MitoTracker Deep Red. Scale bar = 10  $\mu$ m.  
769 B) Flow cytometric analysis of MEF stably over-expressing LZRS control or LZRS-DRP1,  
770 treated with 10  $\mu$ M ABT-737 with and without 20  $\mu$ M QVD for 3 h. Data are expressed  
771 at mean  $\pm$  SEM from 3 independent experiments and analysed using student's t-test.  
772 C) Mutation counts in patient lung adenocarcinoma samples from the highest and lowest  
773 DNM1L mRNA quartiles. Significance is analysed by Mann-Whitney test. Data points  
774 represent individual patient samples, bar represents mean  $\pm$  SD.  
775 D) Mutation counts in patient breast invasive carcinoma cancer samples from the highest  
776 and lowest DNM1L mRNA quartiles. Significance is analysed by Mann-Whitney test.  
777 Data points represent individual patient samples, bar represents mean  $\pm$  SD.  
778 E) *Mfn1*<sup>2<sup>-</sup></sup> and *Mfn1*<sup>1<sup>-</sup></sup> MEF were treated daily for twenty passages with 10  $\mu$ M ABT-737  
779 with and without 20  $\mu$ M QVD. Clonogenic survival was performed in the presence of  
780 100  $\mu$ M PALA. Data is a representative example of 4 independent experiments.  
781 F) Quantification of clonogenic outgrowth from (A) from 4 independent experiments. Data  
782 are expressed as mean  $\pm$  SD and analysed using student's t-test.  
783 G) Quantification of *Cad* DNA levels in *Mfn1*<sup>2<sup>-</sup></sup> and *Mfn1*<sup>1<sup>-</sup></sup> MEF treated with or without  
784 10  $\mu$ M ABT-737. Data are expressed as mean  $\pm$  SD from 3 independent experiments  
785 and analysed using student's t-test.  
786 H) *Mfn1*<sup>2<sup>-</sup></sup> and *Mfn1*<sup>1<sup>-</sup></sup> MEF with and without CRISPR-Cas9-mediated *Dff40* deletion  
787 treated daily for twenty passages with 10  $\mu$ M ABT-737 with and without 20  $\mu$ M QVD.  
788 Clonogenic survival was performed in the presence of 100  $\mu$ M PALA. Data is a  
789 representative example of 3 independent experiments.  
790 I) Quantification of clonogenic outgrowth from (F) from 3 independent experiments. Data  
791 are expressed as mean  $\pm$  SD and analysed using student's t-test.  
792 J) Quantification of *Cad* DNA levels in *Mfn1*<sup>2<sup>-</sup></sup> and *Mfn1*<sup>1<sup>-</sup></sup> MEF with and without *Dff40*  
793 deletion, and treated with or without 10  $\mu$ M ABT-737. Data are expressed as mean  $\pm$   
794 SD from 3 independent experiments, and analysed using student's t-test.  
795 K) *Mfn1*<sup>2<sup>-</sup></sup> and *Mfn1*<sup>1<sup>-</sup></sup> MEF with and without *Dff40* deletion cultured for twenty passages  
796 in 10  $\mu$ M ABT-737 and their anchorage-independent growth assessed by soft agar  
797 assay. Data are expressed as mean  $\pm$  SD from 3 independent experiments, and  
798 analysed using student's t-test.  
799  
800



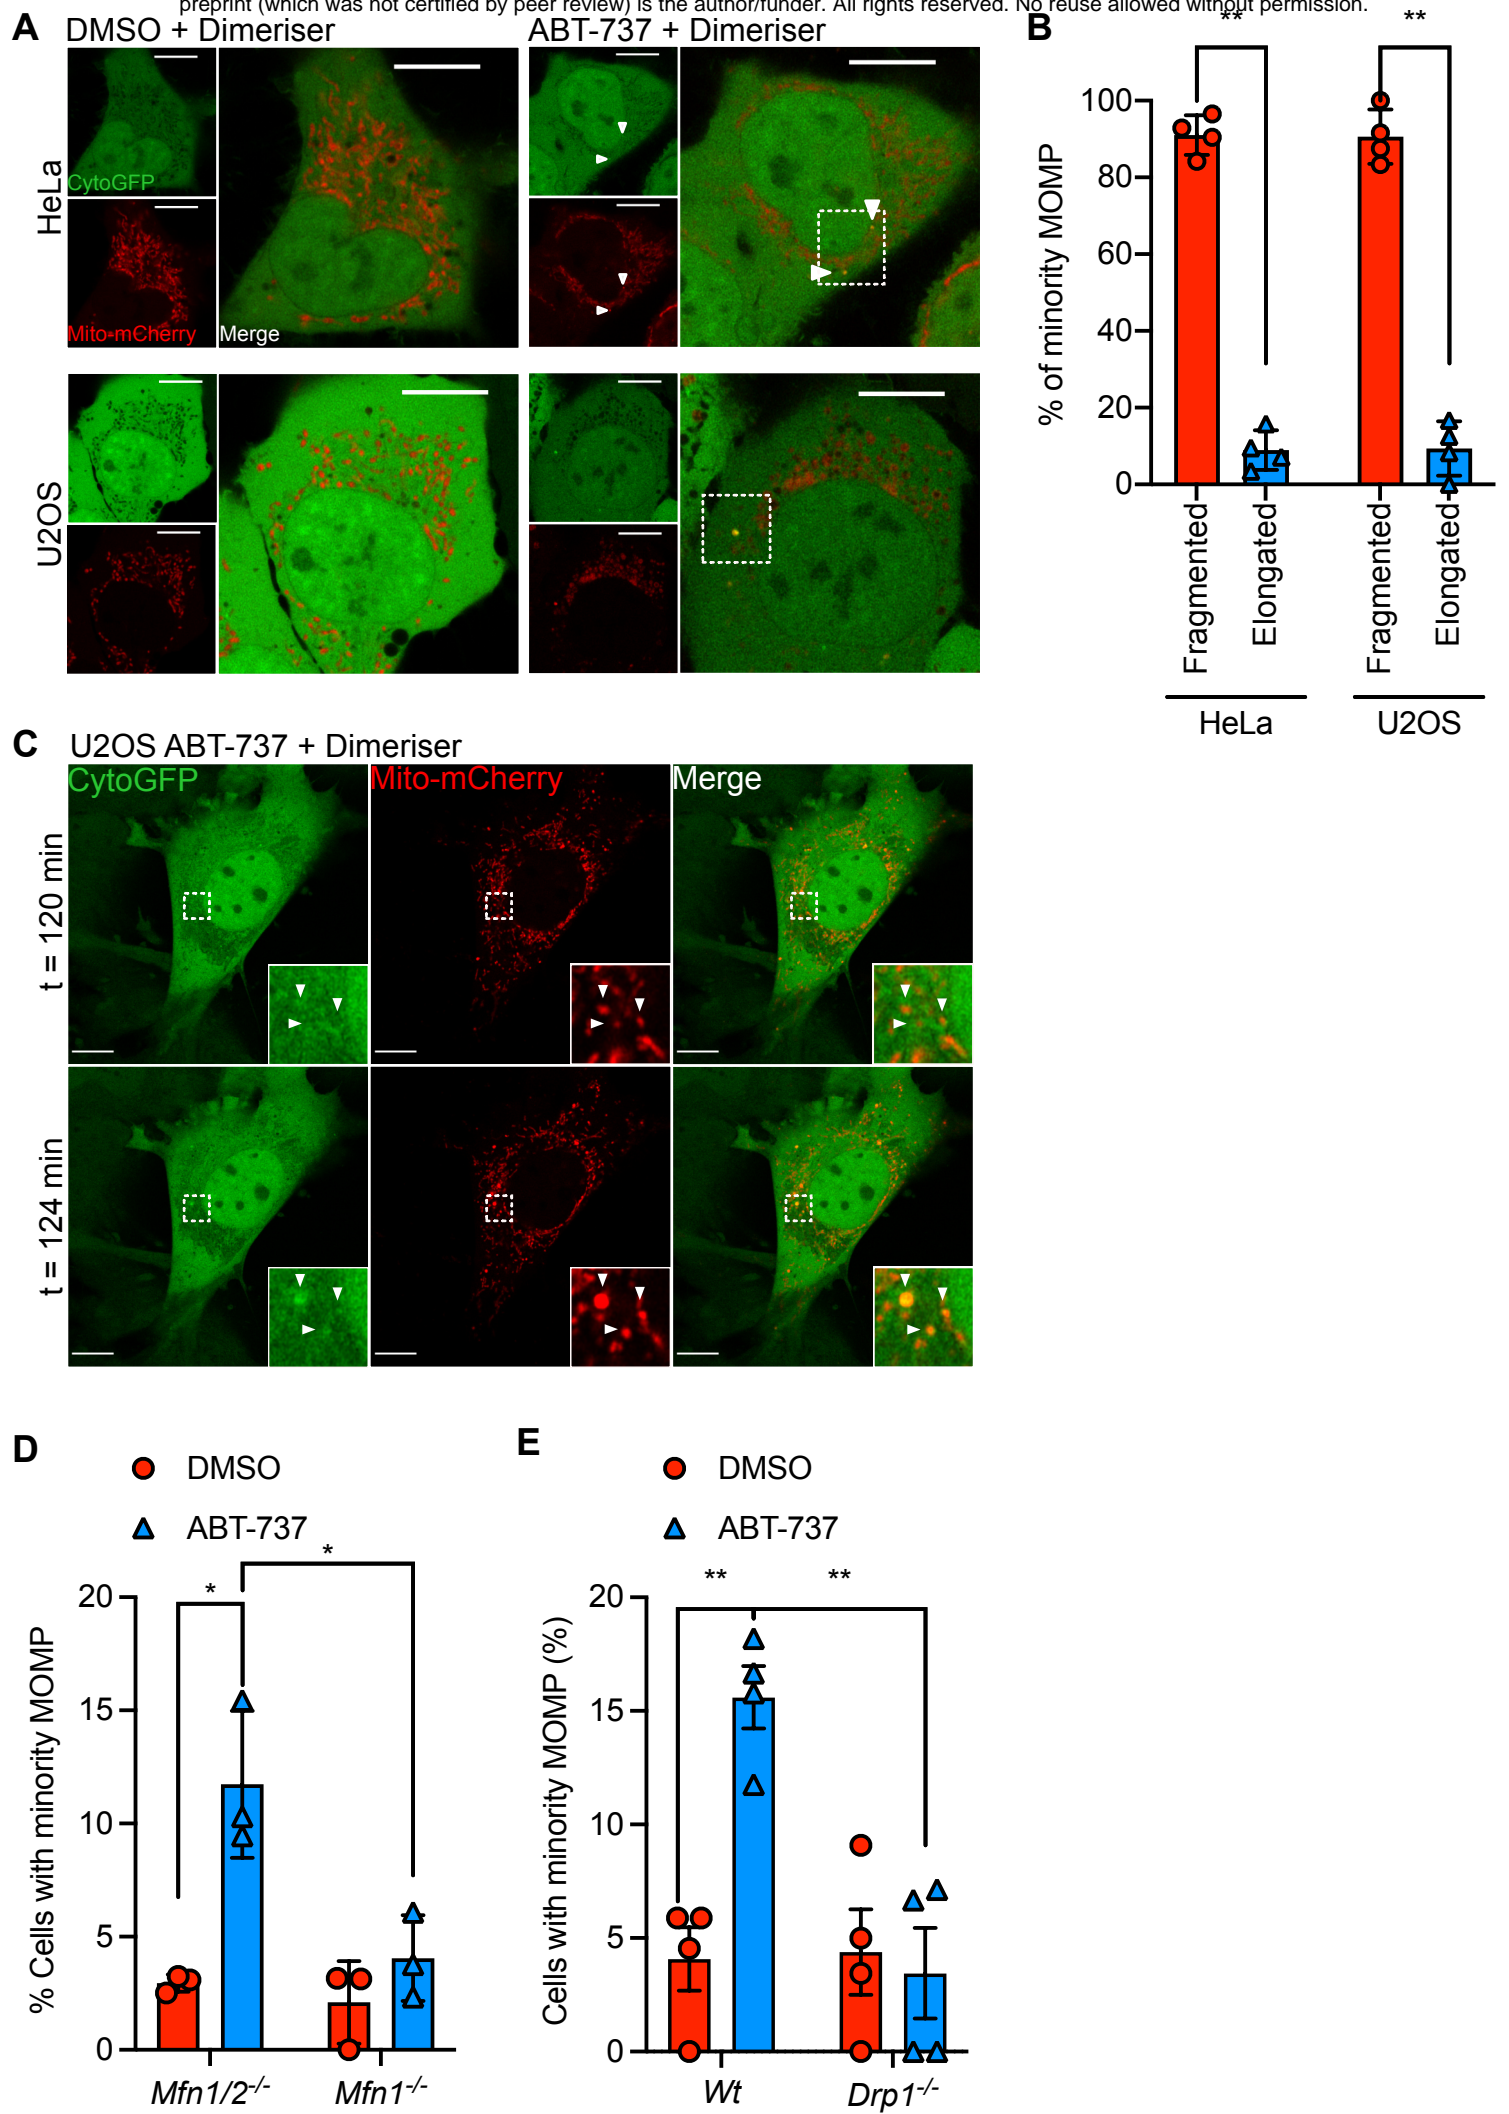

**Figure 3**

801 **Figure 3 Minority MOMP occurs on fragmented mitochondria and is regulated by**  
802 **mitochondrial dynamics**

803

804 A) Fixed super-resolution Airyscan images of HeLa and U2OS cells transfected with cyto-  
805 GFP (green) and mito-mCherry (red). Cells were treated with 10  $\mu$ M ABT-737 for 3 h  
806 in the presence of dimeriser. Scale bar = 10  $\mu$ m.

807 B) Quantification of fragmentation or elongation of mitochondria which have undergone  
808 minority MOMP, as visualised in (A). Data represented as mean  $\pm$  SD from 4  
809 independent experiments and analysed using student's t-test.

810 C) Live-cell Airyscan imaging of U2OS cells transfected with cyto-GFP (green) and mito-  
811 mCherry (red) and treated with 10  $\mu$ M ABT-737 in the presence of dimeriser. Scale bar  
812 = 10  $\mu$ m. See **Movie 1**.

813 D) Quantification of minority MOMP assessed in *Mfn1/2*<sup>-/-</sup> and *Mfn1*<sup>-/-</sup> MEF, transfected  
814 with cyto-GFP and mito-mCherry. Cells were treated with 10  $\mu$ M ABT-737 for 3 h in  
815 the presence of dimeriser. Data represented as mean  $\pm$  SEM from 3 independent  
816 experiments.

817 E) Quantification of minority MOMP assessed in Wt and *Drp1*<sup>fl/fl</sup> MEF, transfected with  
818 cyto-GFP and mito-mCherry. Cells were treated with 10  $\mu$ M ABT-737 for 3 h in the  
819 presence of dimeriser. Data represented as mean  $\pm$  SEM from 4 independent  
820 experiments.

821

822

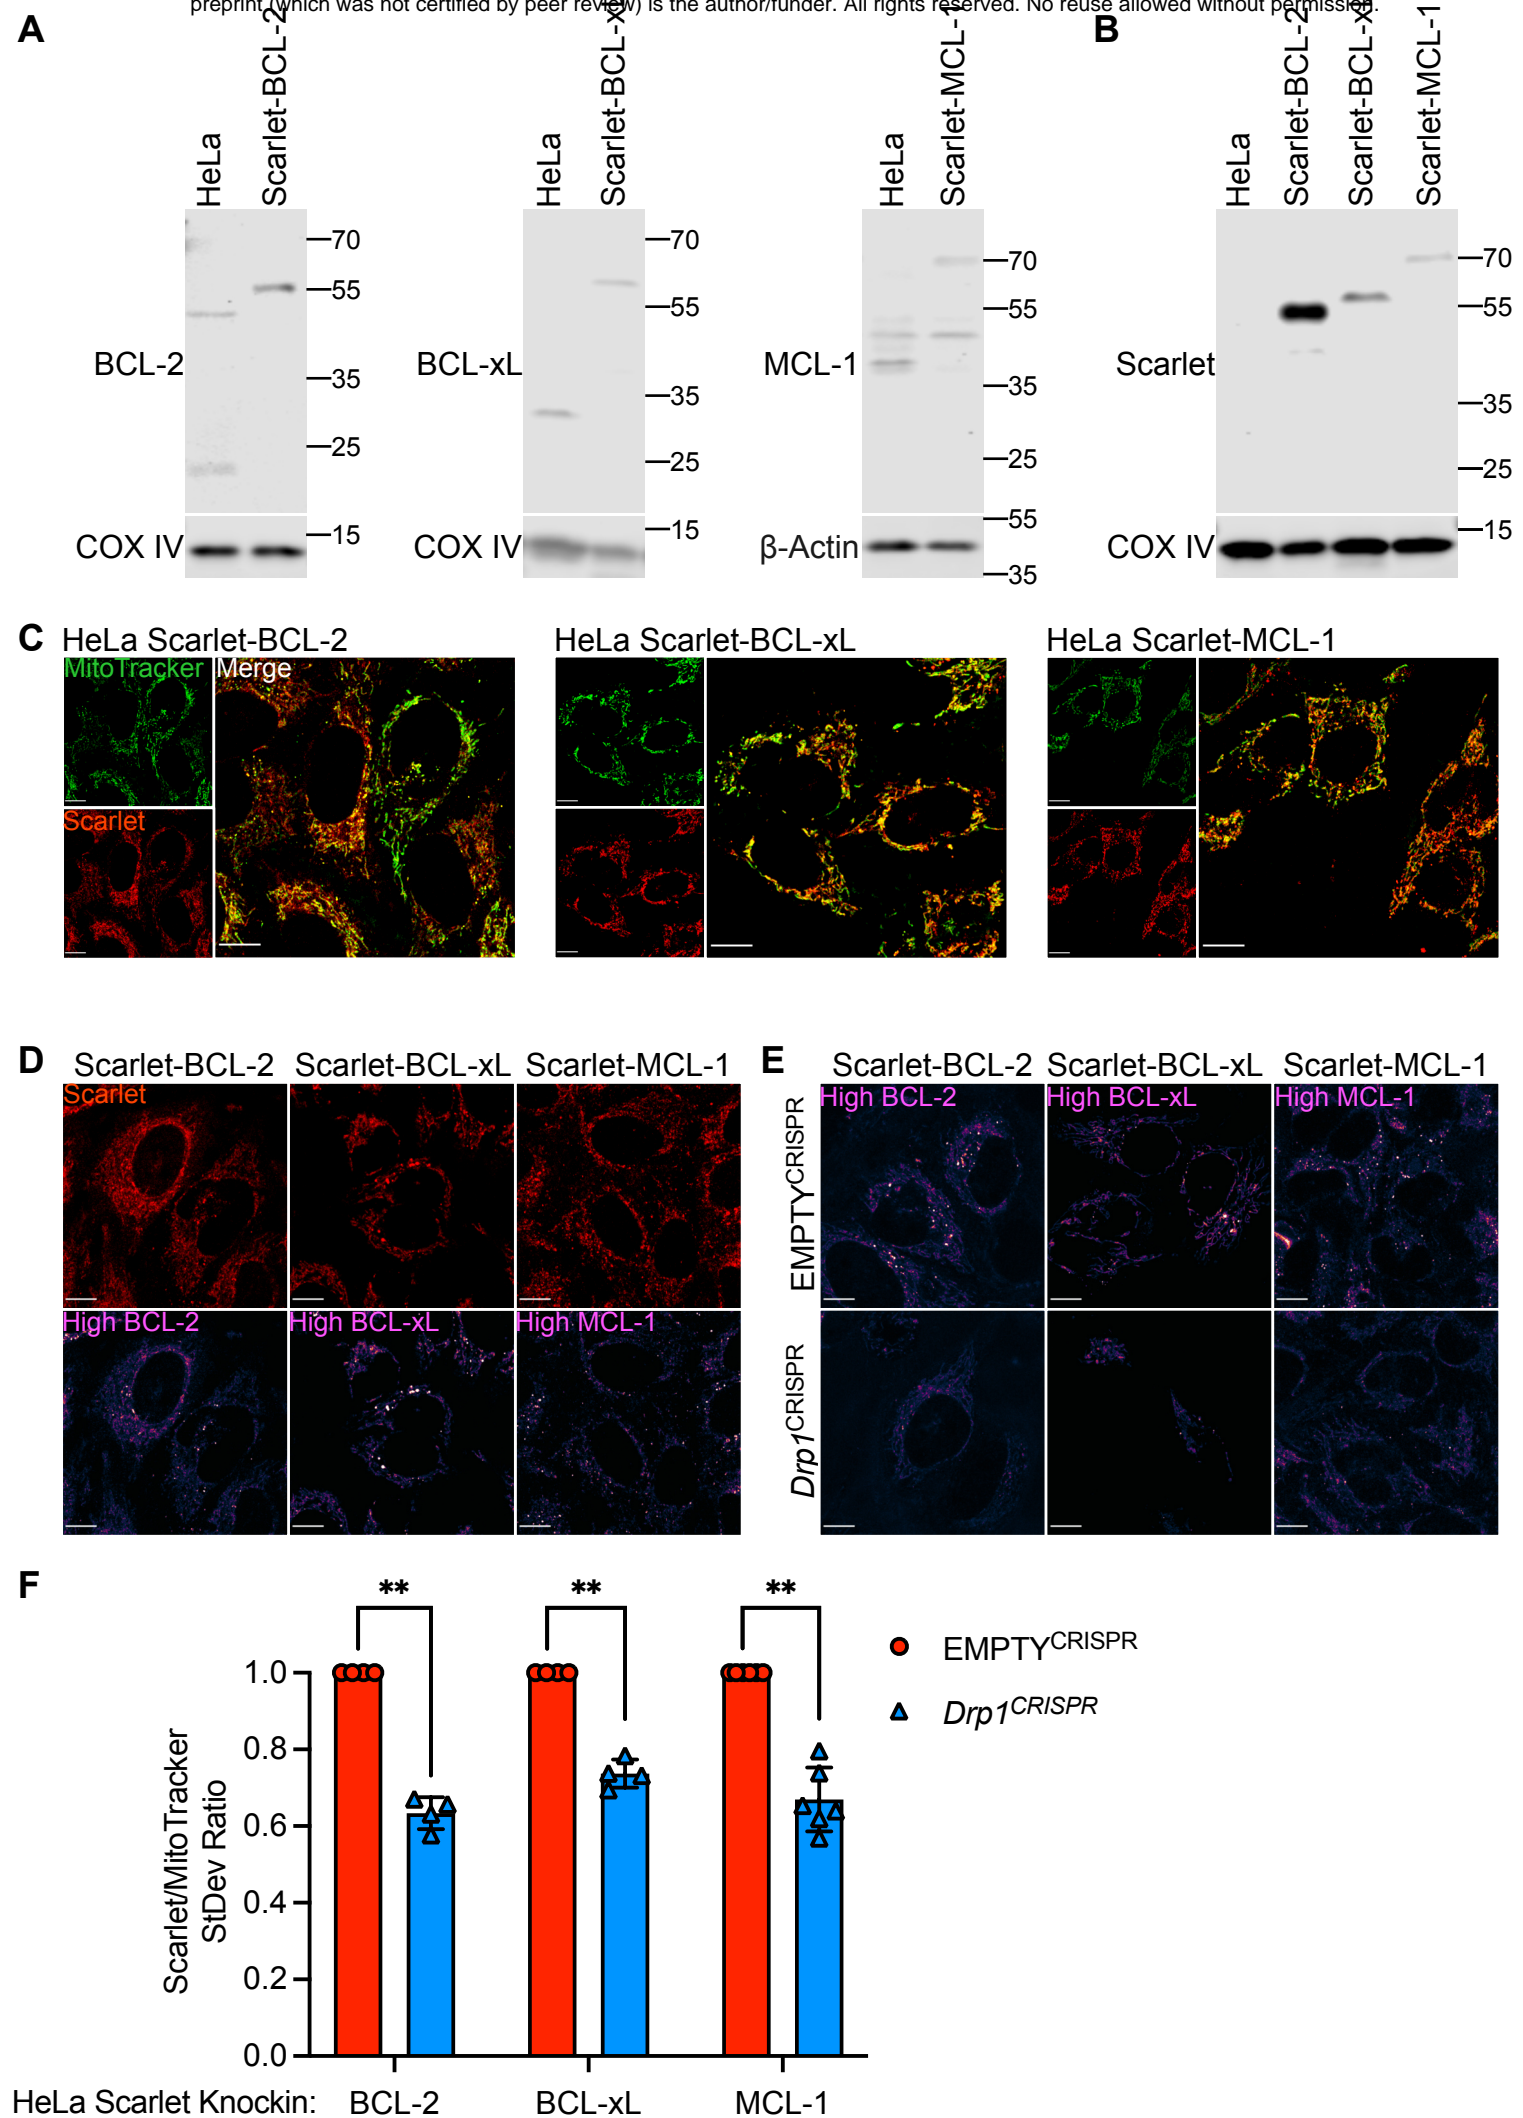

**Figure 4**

823 **Figure 4 Pro-survival BCL-2 proteins display inter-mitochondrial heterogeneity in**  
824 **expression**

825

826 A) Immunoblots of HeLa cells with CRISPR-Cas9-mediated knockin of Scarlet into the  
827 BCL-2, BCL-xL or MCL-1 locus using antibodies against BCL-2, BCL-xL or MCL-1.  
828 COX IV or  $\beta$ -actin serves as loading controls

829 B) Immunoblots of HeLa cells with CRISPR-Cas9-mediated knockin of Scarlet into the  
830 BCL-2, BCL-xL or MCL-1 locus using an antibody against Scarlet. COX IV serves as  
831 a loading control.

832 C) Live-cell Airyscan imaging of HeLa Scarlet-BCL-2, Scarlet-BCL-xL and Scarlet-MCL-1  
833 cells. Cells were incubated with MitoTracker Green to stain mitochondria.

834 D) Live-cell Airyscan imaging of HeLa Scarlet-BCL-2, Scarlet-BCL-xL and Scarlet-MCL-1  
835 cells. Magenta LUT applied to reveal areas of high BCL-2, BCL-XL and MCL-1  
836 expression.

837 E) Live-cell Airyscan imaging of HeLa Scarlet-BCL-2, Scarlet-BCL-xL and Scarlet-MCL-1  
838 cells with and without CRISPR-Cas9-mediated *Drp1* deletion. Magenta LUT applied to  
839 reveal areas of high BCL-2, BCL-XL and MCL-1 expression.

840 F) Quantification of Scarlet to MitoTracker signal standard deviation in HeLa Scarlet-BCL-  
841 2, Scarlet-BCL-xL and Scarlet-MCL-1 cells, with and without CRISPR-Cas9-mediated  
842 *Drp1* deletion. Data are expressed as mean  $\pm$  SD from 4 independent experiments and  
843 analysed using student's t-test.

844

845



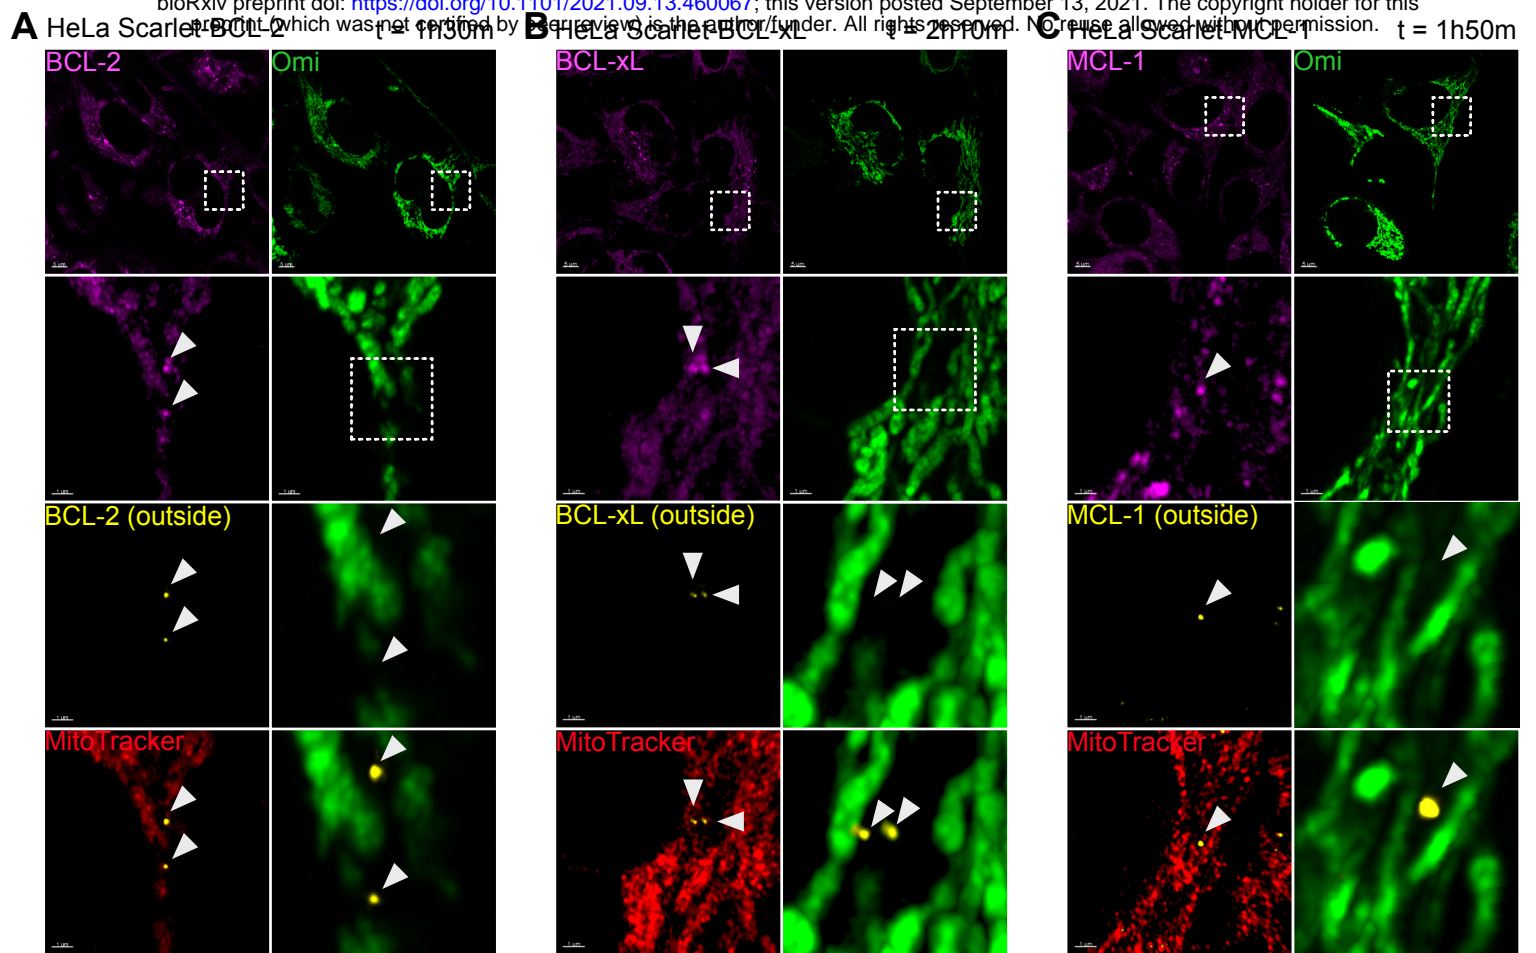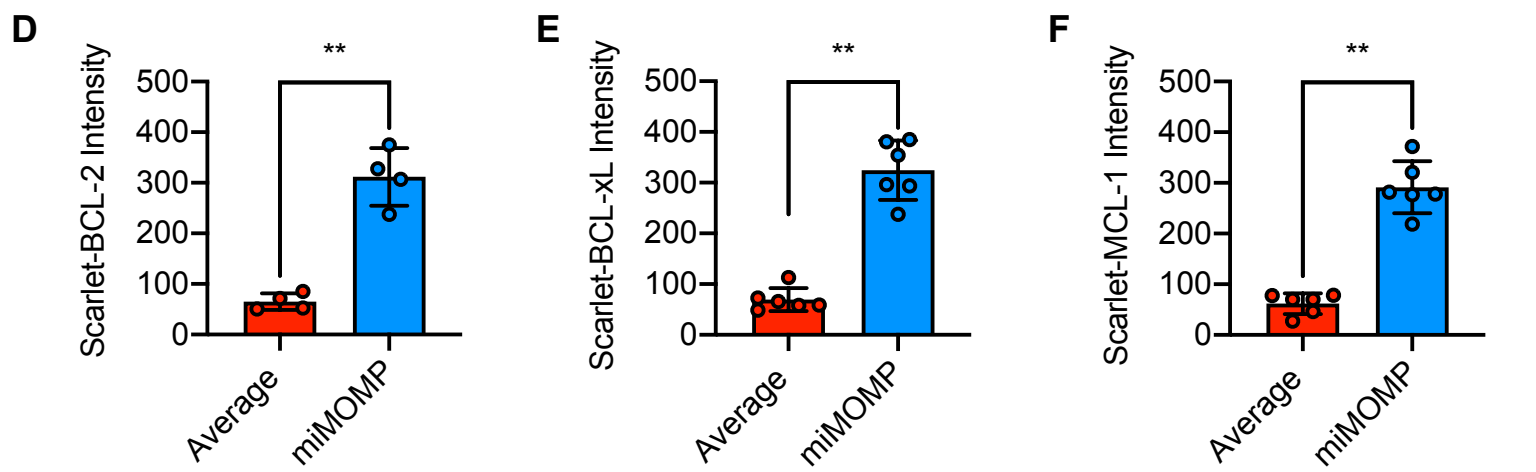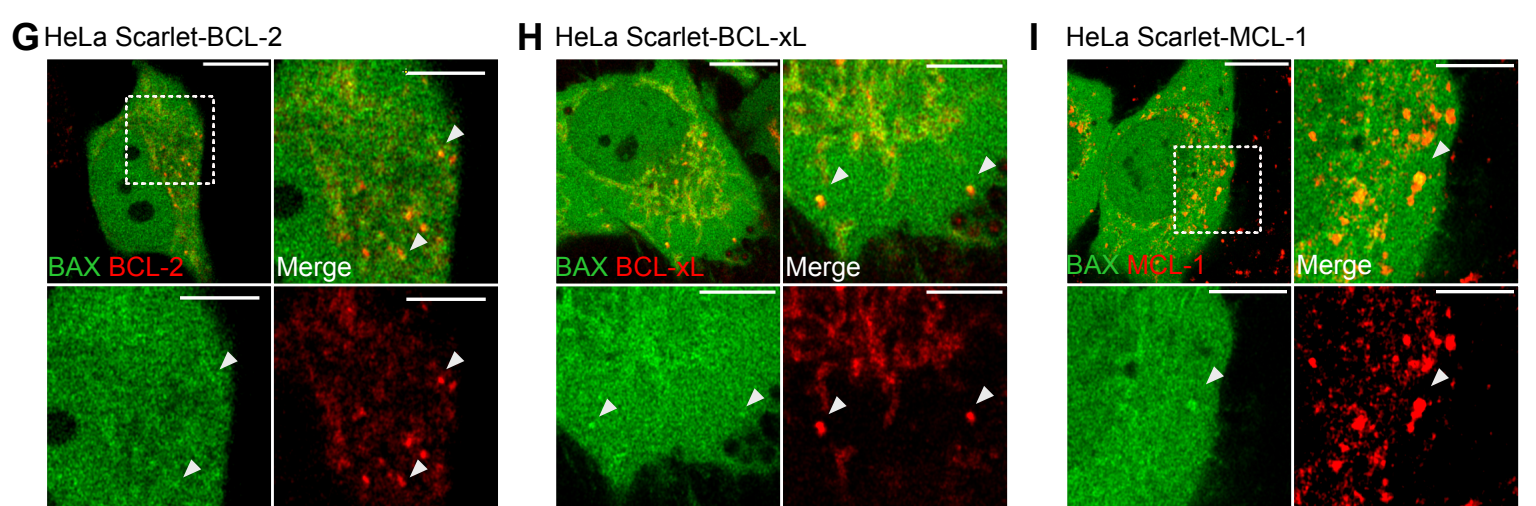

**Figure 5**

846 **Figure 5 Heterogeneity in apoptotic priming underpins minority MOMP**

847

848 A) Live-cell Airyscan imaging of HeLa Scarlet-BCL-2 transfected with Omi-GFP and  
849 incubated with MitoTracker Deep Red. Cells were treated with 10  $\mu$ M ABT-737 for the  
850 time indicated. Images were processed with Imaris to determine BCL-2, BCL-xL or  
851 MCL-1 expression at mitochondrial areas lacking Omi-GFP expression.

852 B) HeLa Scarlet-BCL-xL imaged as (A)

853 C) HeLa Scarlet-MCL-1 imaged as (A)

854 D) Quantification of Scarlet BCL-2 intensity at mitochondrial regions determined by  
855 MitoTracker Deep Red staining, but lacking Omi-GFP. Data are expressed as mean  $\pm$   
856 SD and analysed using student's t-test.

857 E) HeLa Scarlet-BCL-xL quantified as (D).

858 F) HeLa Scarlet-MCL-1 quantified as (D).

859 G) Live-cell Airyscan imaging of HeLa Scarlet-BCL-2 cells stably overexpressing GFP-  
860 BAX. Arrows indicate regions of high BCL-2 expression with high GFP-BAX  
861 expression. Scale bar = 10  $\mu$ m.

862 H) Live-cell Airyscan images of HeLa Scarlet-BCL-xL cells stably overexpressing GFP-  
863 BAX. Arrows indicate regions of high BCL-xL expression with high GFP-BAX  
864 expression. Scale bar = 10  $\mu$ m.

865 I) Live-cell Airyscan images of HeLa Scarlet-MCL-1 cells stably overexpressing GFP-  
866 BAX. Arrows indicate regions of high MCL-1 expression with high GFP-BAX  
867 expression. Scale bar = 10  $\mu$ m.

868

869

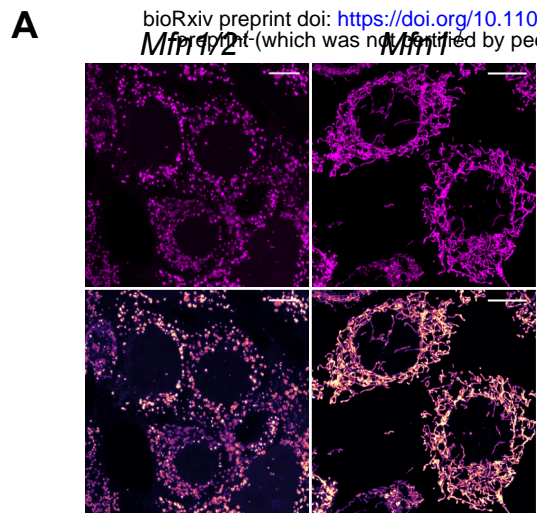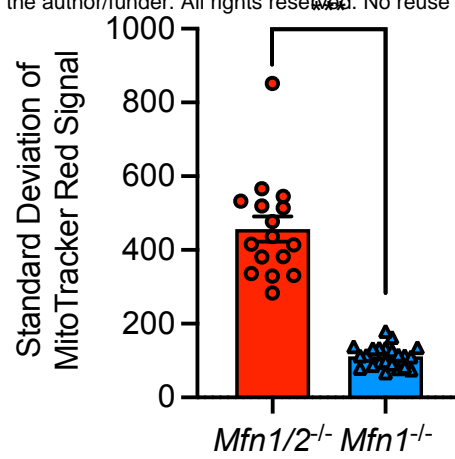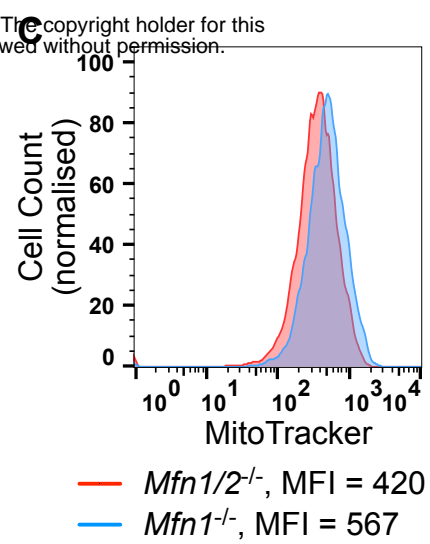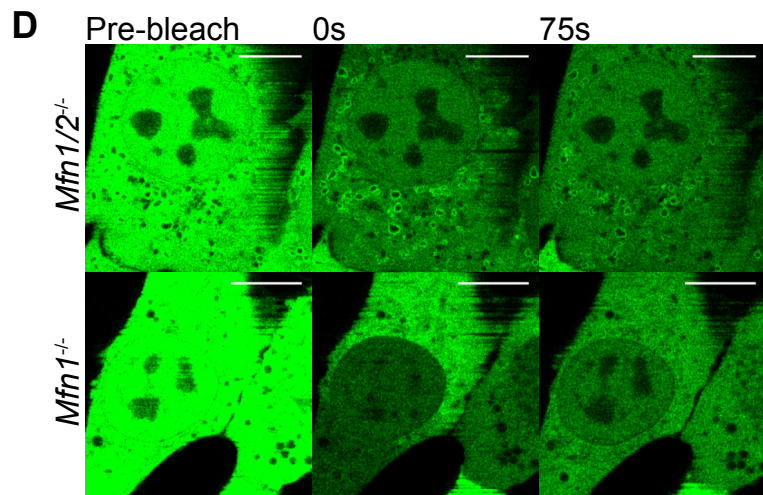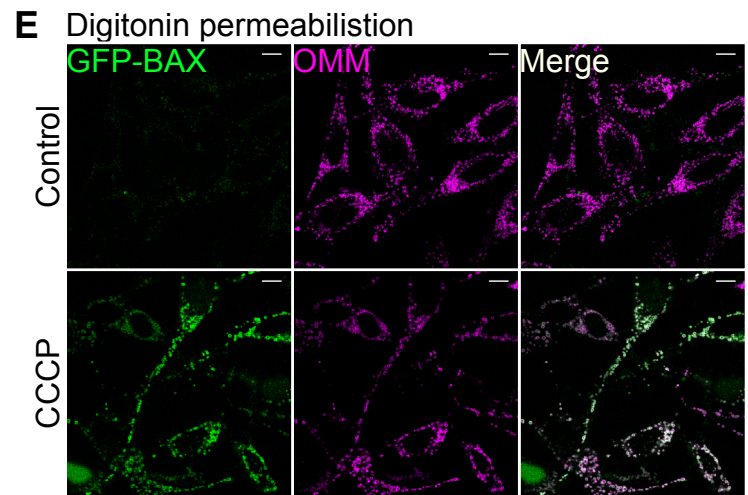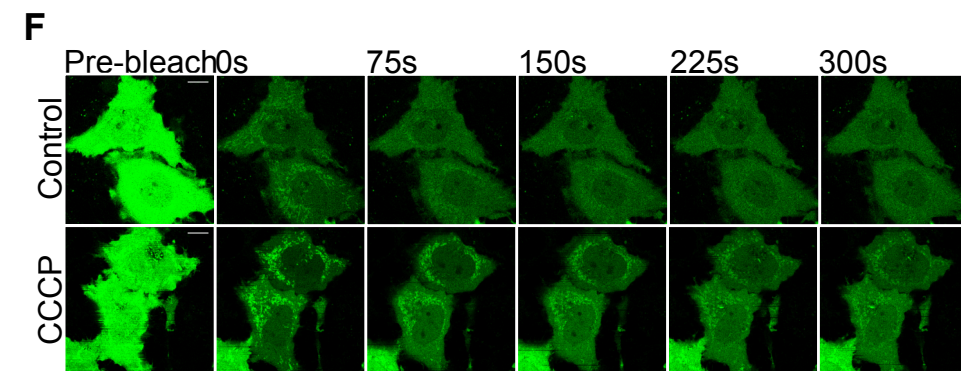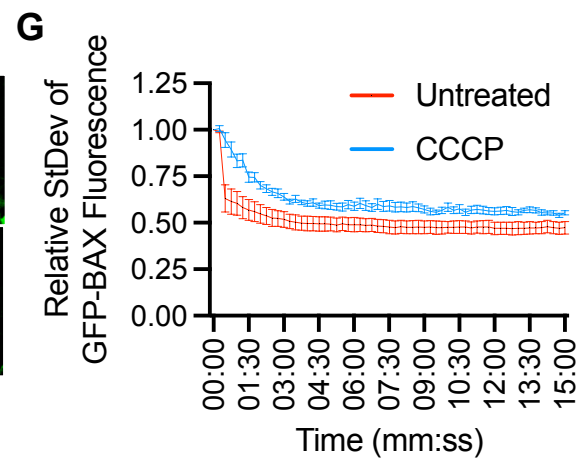

**Figure 6**

870 **Figure 6 Mitochondrial dysfunction inhibits BAX retrotranslocation promoting minority**  
871 **MOMP**

872

873 A) *Mfn1/2*<sup>-/-</sup> and *Mfn1*<sup>-/-</sup> MEF pulsed with MitoTracker Red and imaged. Images with  
874 magenta LUT applied are shown in lower panels. Scale bar = 10 μm. Data are  
875 representative from 3 independent experiments.

876 B) Standard deviation of MitoTracker Red signal in *Mfn1/2*<sup>-/-</sup> and *Mfn1*<sup>-/-</sup> MEF pulsed with  
877 MitoTracker Red. Data are from 3 independent experiments, and analysed using  
878 student's t-test.

879 C) Fluorescence profiles of *Mfn1/2*<sup>-/-</sup> and *Mfn1*<sup>-/-</sup> MEF pulsed with MitoTracker Red. Data  
880 are representative of 2 independent experiments.

881 D) *Mfn1/2*<sup>-/-</sup> and *Mfn1*<sup>-/-</sup> MEF stably expressing GFP-BAX images pre- and post-bleaching  
882 to reveal mitochondrially localised GFP-BAX. Scale bar = 10 μm. Data are  
883 representative from 3 independent experiments. See **Movie 2**.

884 E) HeLa cells stably overexpressing GFP-BAX and iRFP-Omp25 were incubated with 20  
885 μM digitonin to permeabilise the plasma membrane. Permeabilised cells, treated with  
886 or without 10 μM of CCCP for 30 min prior to digitonin were imaged by Airyscan  
887 microscopy. Scale bar = 10 μm. Data are representative of cells from at least 2  
888 independent experiments. See **Movie 3**.

889 F) HeLa cells stably expressing GFP-BAX treated with and without 10 μM of CCCP for  
890 30 min shown pre- and post-bleaching. Scale bar = 10 μm. See **Movie 5**.

891 G) Quantification of standard deviation of GFP-BAX signal in mitochondrial regions from  
892 cells treated with and without 10 μM CCCP from 3 independent experiments.

893

894

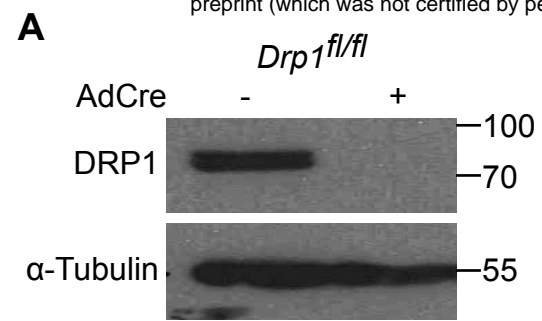

895 **Supplementary Figure 1** (related to Figure 1)

896 A) Western blot of *Drp1<sup>fl/fl</sup>* MEF with and without adenoviral Cre infection. Lysates  
897 immunoblotted for DRP1 and  $\alpha$ -tubulin.

898

899



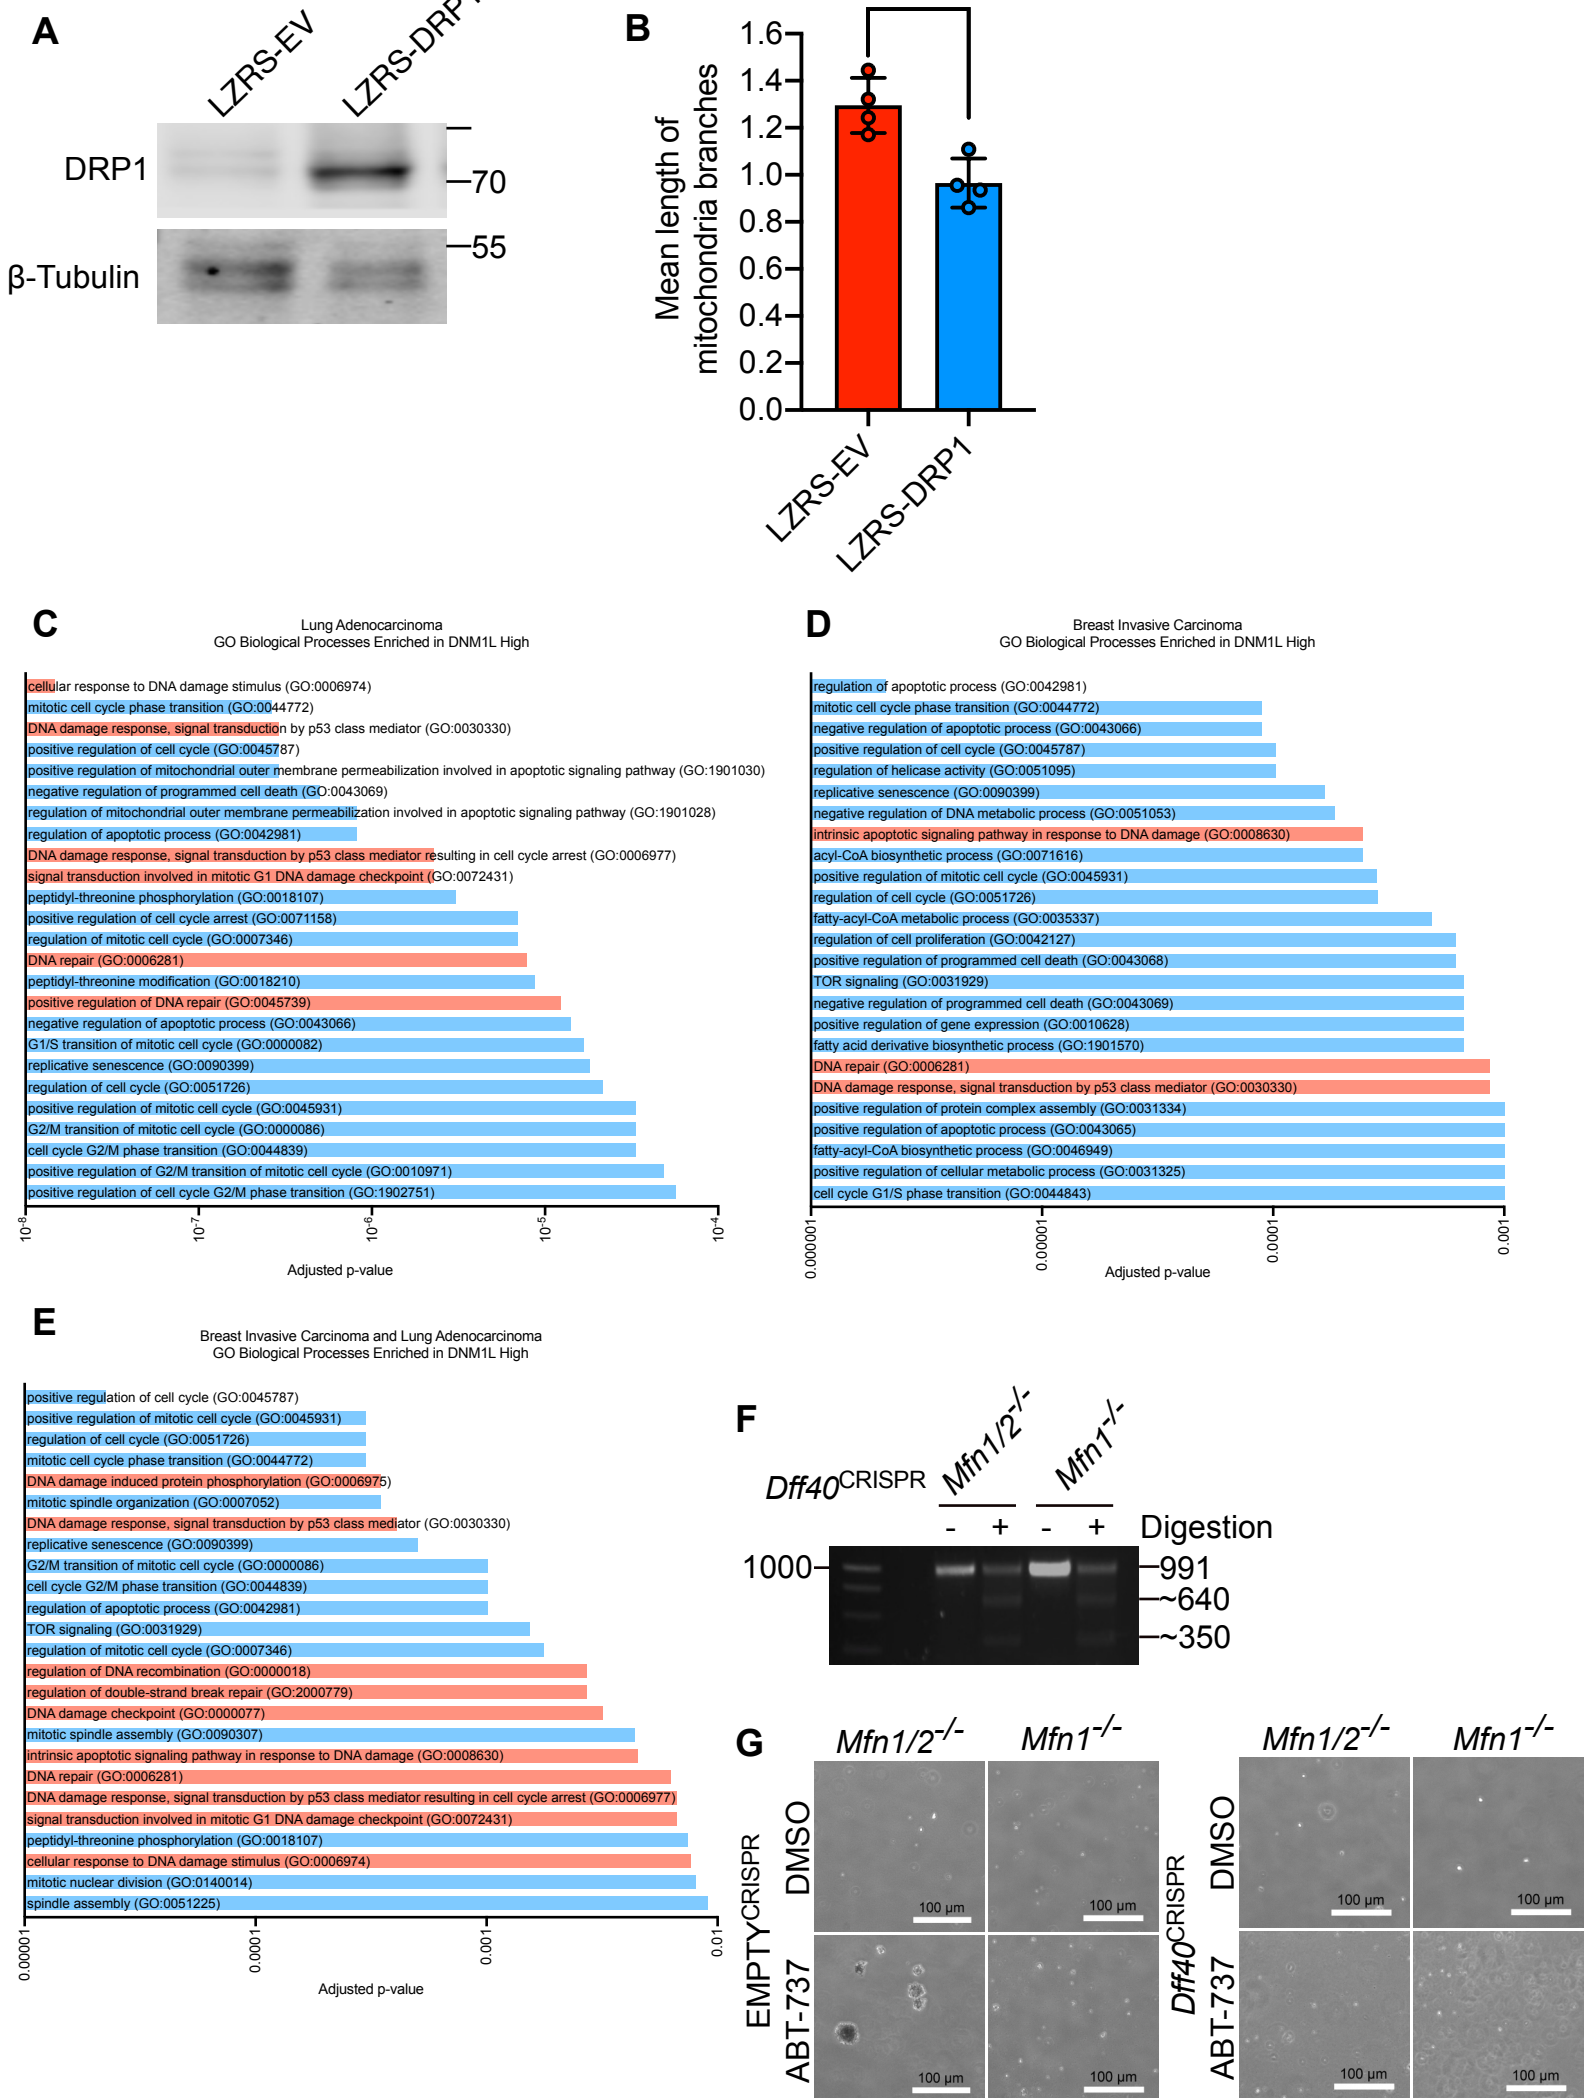

900 **Supplementary Figure 2** (related to Figure 2)

901 A) Western blot of MEF expressing LZRS empty control, or LZRS-DRP1. Lysates  
902 immunoblotted for DRP1 and  $\beta$ -tubulin.

903 B) Quantification of mitochondrial branch size in confocal images obtained of MEF stably  
904 overexpressing LZRS empty control, or LZRS-DRP1.

905 C) Gene ontology (GO) biological processes significantly up-regulated in DNMT1L high  
906 expressing lung adenocarcinoma samples. Bars in red represent GO biological  
907 processes related to DNA damage and are expressed as adjusted p-values.

908 D) Gene ontology (GO) biological processes significantly up-regulated in DNMT1L high  
909 expressing breast invasive carcinoma samples. Bars in red represent GO biological  
910 processes related to DNA damage and are expressed as adjusted p-values.

911 E) Gene ontology (GO) biological processes significantly up-regulated in DNMT1L high  
912 expressing lung adenocarcinoma and breast invasive carcinoma samples. Bars in red  
913 represent GO biological processes related to DNA damage and are expressed as  
914 adjusted p-values.

915 F) T7 endonuclease I mismatch assay to assay for *CAD/Dff40* deletion.

916 G) Representative images of anchorage-independent growth of *Mfn1/2<sup>-/-</sup>* and *Mfn1<sup>-/-</sup>* MEF  
917 with and without CRISPR-Cas9-mediated *Dff40* deletion. Cells were passaged twenty  
918 times in 10  $\mu$ M ABT-737. Scale bar = 100  $\mu$ m. Data are quantified in **Figure 2K**.

919

920



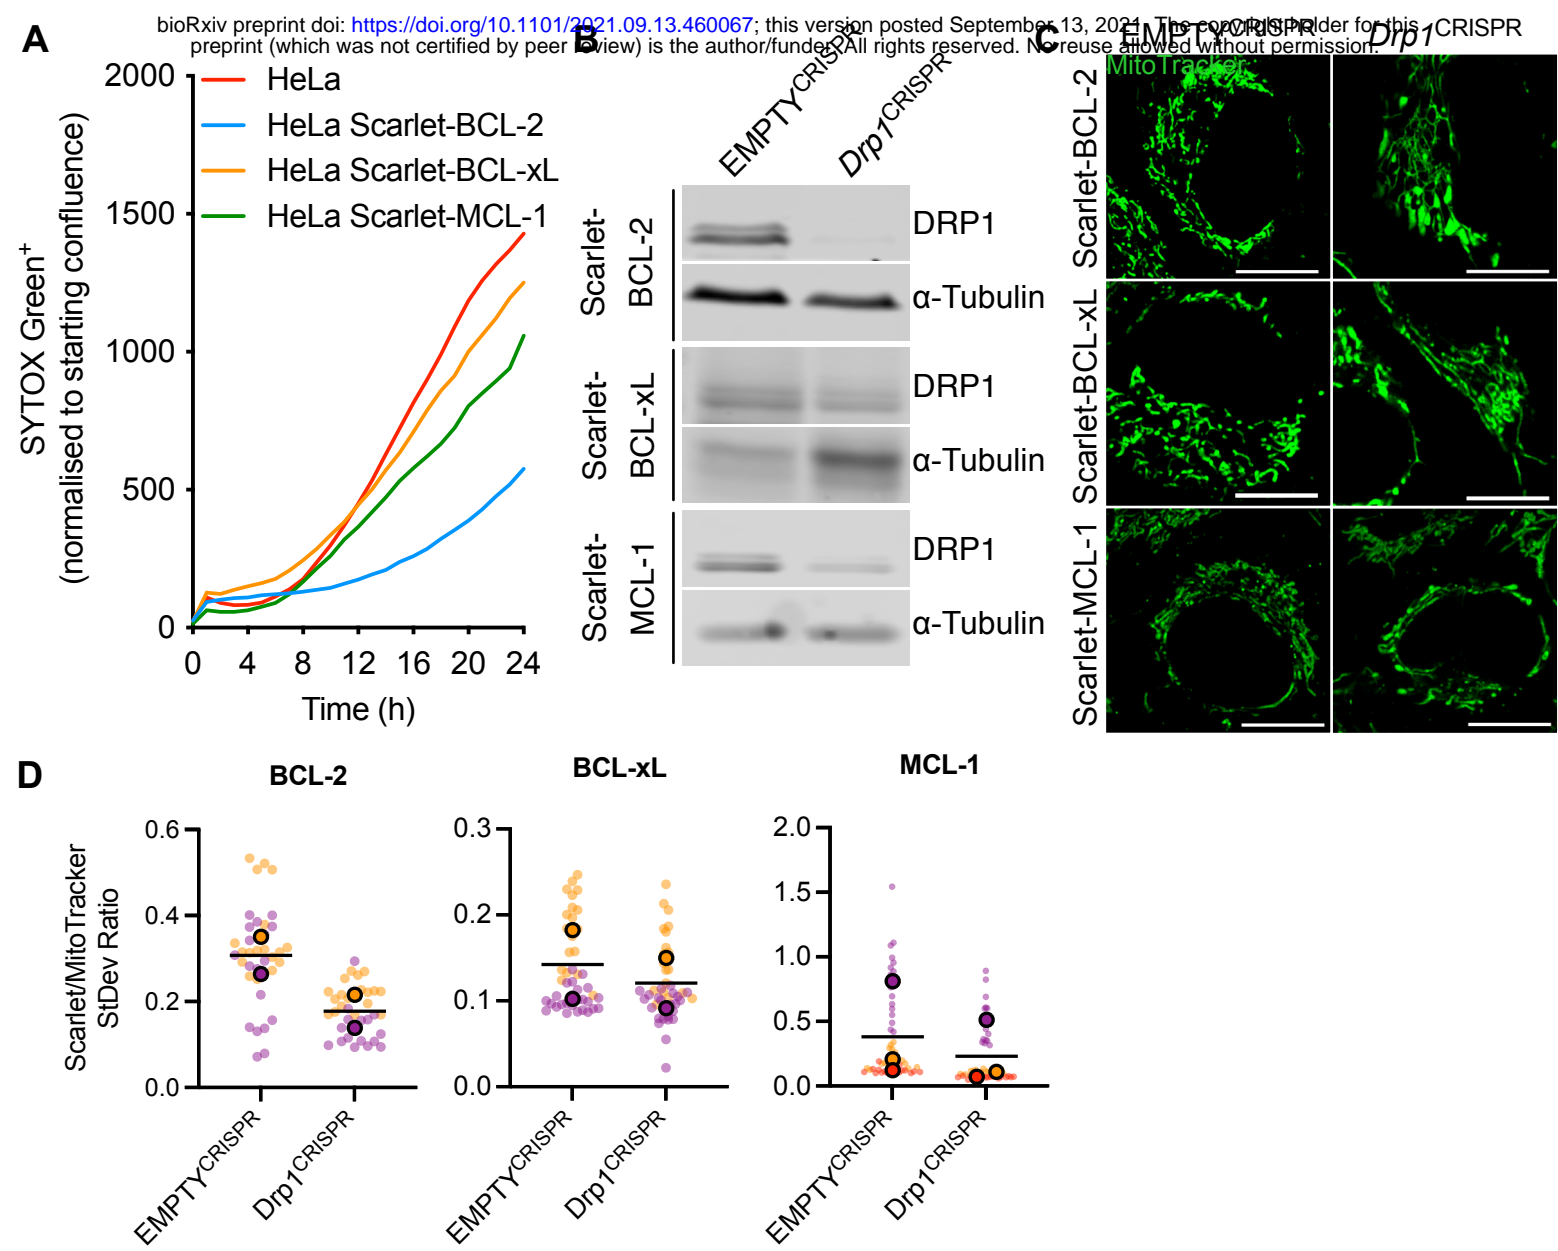

921 **Supplementary Figure 3** (related to Figure 4)

- 922 A) Live-cell IncuCyte analysis of HeLa and HeLa Scarlet-MCL-1 knockin cells treated with  
923 10  $\mu$ M ABT-737 and 2  $\mu$ M S63845. Cells were incubated with SYTOX Green and  
924 SYTOX Green positivity was measured over time and normalised to starting  
925 confluency.
- 926 B) Western blots of HeLa Scarlet-BCL-2, BCL-xL and MCL-1 knockin cells with CRISPR-  
927 Cas9-mediated DRP1 deletion. Lysates immunoblotted for DRP1 and  $\alpha$ -tubulin as a  
928 loading control.
- 929 C) Representative Airyscan images of mitochondrial structure in HeLa Scarlet-BCL-2,  
930 BCL-xL and MCL-1 knockin cells with CRISPR-Cas9-mediated DRP1 deletion. Scale  
931 bar = 10  $\mu$ m.
- 932 D) Quantification of standard deviation of Scarlet to MitoTracker signal in HeLa Scarlet  
933 BCL-2, BCL-xL and MCL-1 cells, with or without CRISPR-Cas9-mediated DRP1  
934 deletion. Data are expressed as borderless points for individual cells and points with  
935 borders represent summary data for  $n = 2$  biological replicates for BCL-2 and BCL-xL,  
936 and  $n = 3$  for MCL-1.  
937  
938

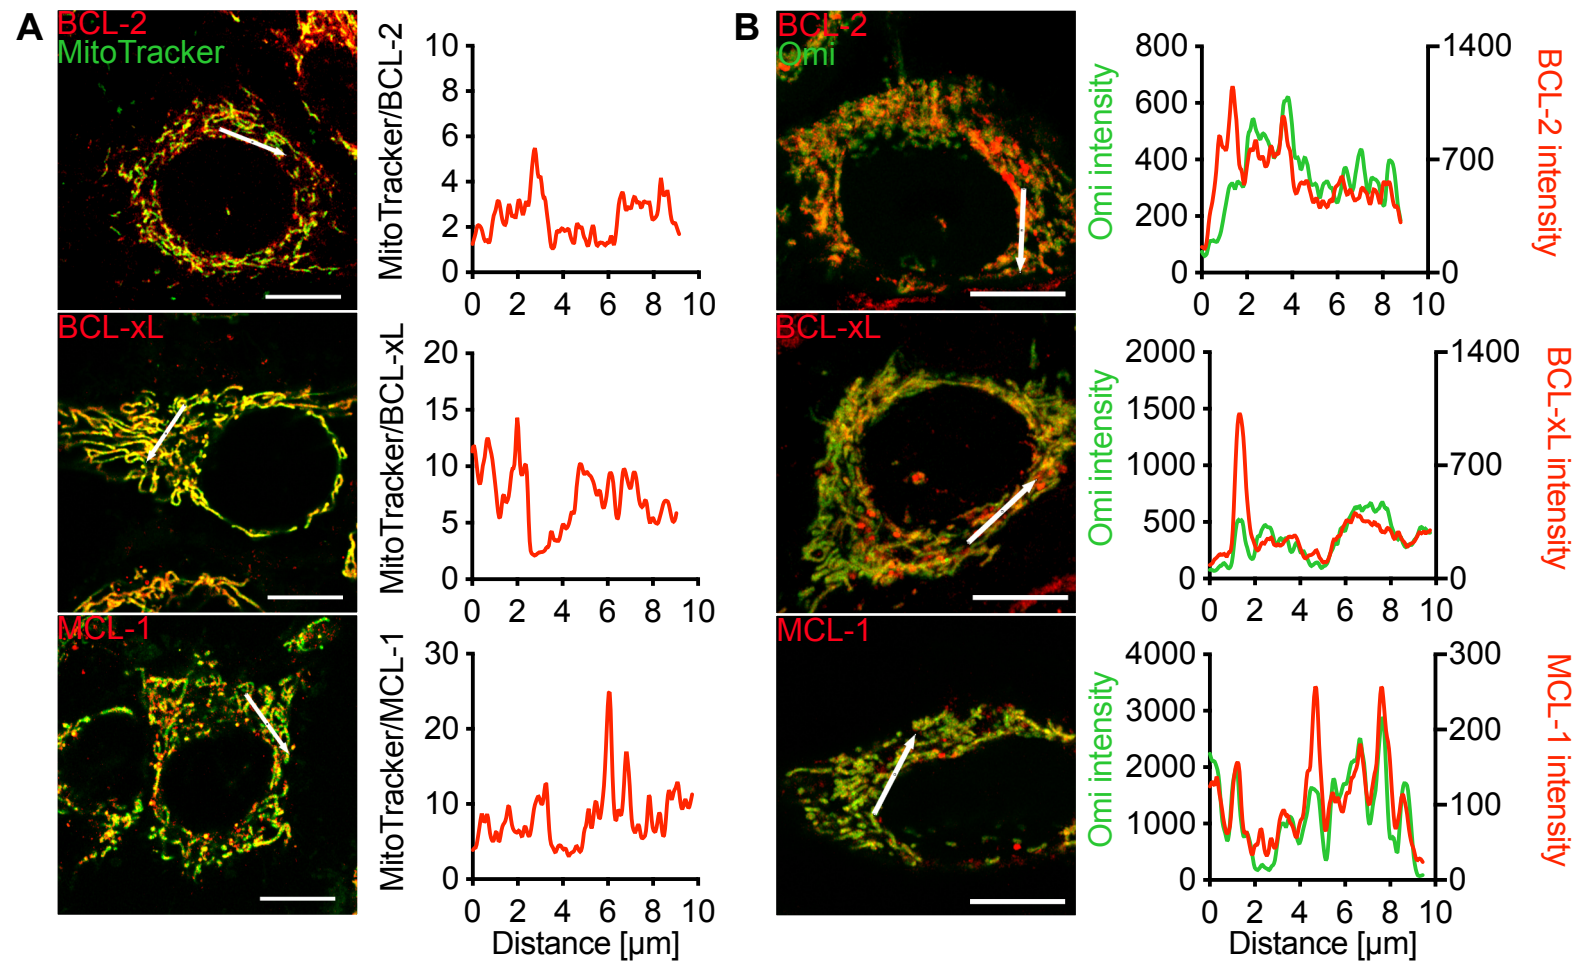

939 **Supplementary Figure 4** (related to Figure 5)

940 A) Airyscan images of HeLa Scarlet-BCL-2, BCL-xL and MCL-1 knockin cells and  
941 MitoTracker. Line scans show ratio of MitoTracker to Scarlet-BCL-2. Scale bar =  
942 10  $\mu\text{m}$ .

943 B) Airyscan images of HeLa Scarlet-BCL-2, BCL-xL and MCL-1 knockin cells and  
944 Omi-GFP. Line scans show ratio of Omi-GFP intensity (green) and Scarlet-BCL-2  
945 intensity (red). Scale bar = 10  $\mu\text{m}$ .

946  
947

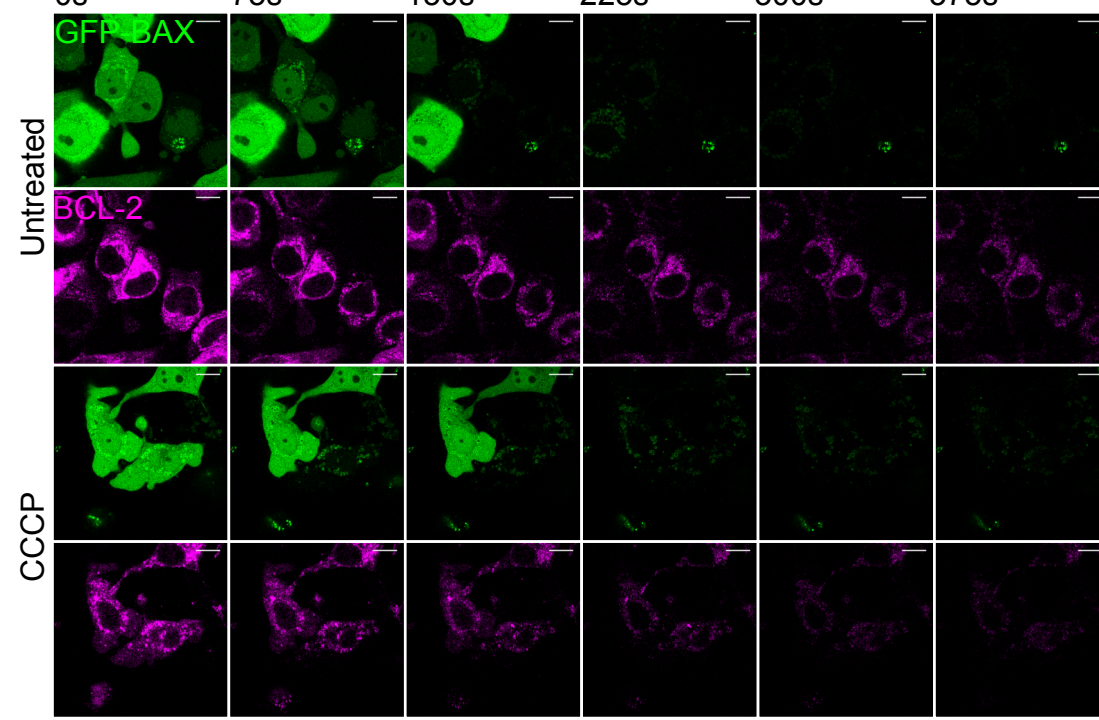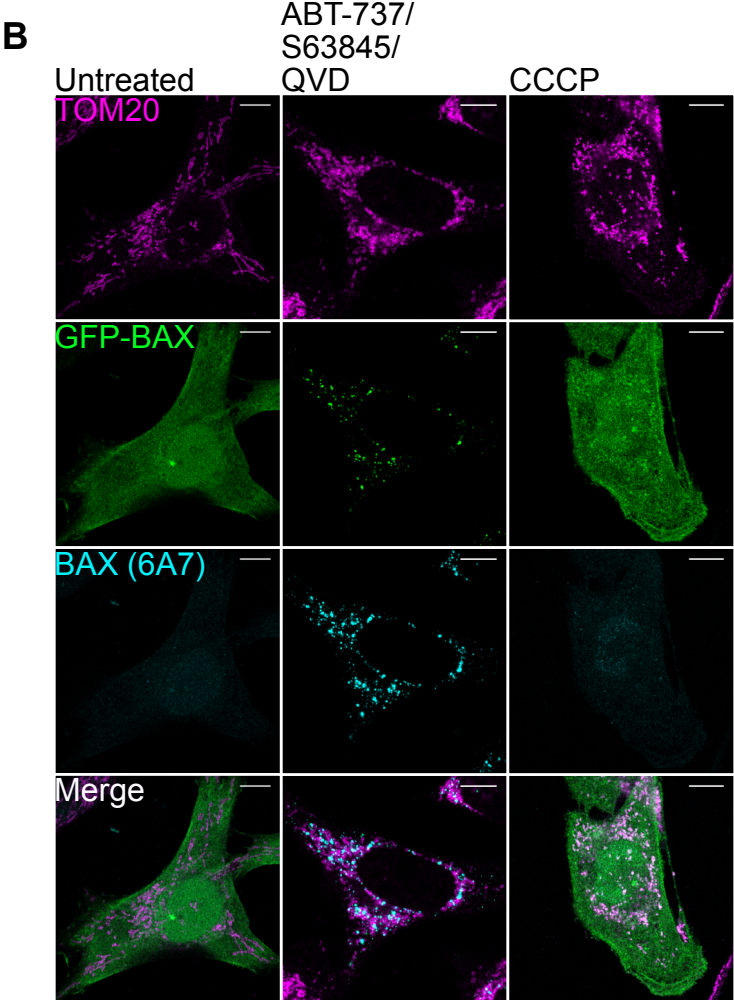



948 **Supplementary Figure 5** (related to Figure 6)

949 A) Images of HeLa Scarlet-BCL-2 knockin (magenta) cells stably overexpressing GFP-  
950 BAX (green) treated 10  $\mu$ M CCCP for 30 min before digitonin permeabilisation. Scale  
951 bar = 10  $\mu$ m. See also **Movie 4**.

952 B) Airyscan images of fixed HeLa cells stably overexpressing GFP-BAX (green) and  
953 treated with 10  $\mu$ M CCCP or 10  $\mu$ M ABT-737, 2  $\mu$ M S63845 and 10  $\mu$ M QVD for 3 h.  
954 Cells were immunostained with anti-TOM20 (magenta) and anti-BAX 6A7 (cyan).  
955 Scale bar = 10  $\mu$ m.

956

957

958

959

960

961

962

963

964

965

966 **Movie 1**  
967 U2OS transfected with cytoGFP (green) and mito-mCherry (red) and treated with 10  $\mu$ M ABT-  
968 737. Movie starts at 120 min. See **Figure 3C**.  
969  
970 **Movie 2**  
971 *Mfn1/2<sup>-/-</sup>* MEFs stably expressing GFP-BAX (green) and stained with MitoTracker Red (red).  
972 Cells imaged every 15 sec and bleached after 30 sec. See **Figure 6D**.  
973  
974 **Movie 3**  
975 *Mfn1<sup>-/-</sup>* MEFs stably expressing GFP-BAX (green) and stained with MitoTracker Red (red).  
976 Cells imaged every 15 sec and bleached after 30 sec. See **Figure 6D**.  
977  
978 **Movie 4**  
979 HeLa cells stably expressing GFP-BAX (green) and iRFP-Omp25 (magenta). Cells were  
980 incubated with digitonin to permeabilise the plasma membrane and imaged every 60 sec. See  
981 **Figure 6E**.  
982  
983 **Movie 5**  
984 HeLa cells stably expressing GFP-BAX (green) and iRFP-Omp25 (magenta) and treated with  
985 10  $\mu$ M CCCP. Cells were incubated with digitonin to permeabilise the plasma membrane and  
986 imaged every 60 sec. See **Figure 6E**.  
987  
988 **Movie 6**  
989 *Mfn1/2<sup>-/-</sup>* MEFs stably expressing GFP-BAX (green) and iRFP-Omp25 (magenta). Cells were  
990 imaged every 15 sec and bleached after 30 sec. See **Figure 6F**.  
991  
992 **Movie 7**  
993 *Mfn1<sup>-/-</sup>* MEFs stably expressing GFP-BAX (green) and iRFP-Omp25 (magenta). Cells were  
994 treated with 10  $\mu$ M CCCP and imaged every 15 sec and bleached after 30 sec. See **Figure**  
995 **6F**.  
996  
997  
998  
999
